# Supplementary material for: In situutilization of photogenerated hydrogen for hydrogenation reaction over a covalent organic framework
Source: Royal Society of Chemistry journal article supplement (doi:10.1039/d2cc06228c), 2023-01-01
Supplement: d2cc06228c1.pdf [file d2cc06228c1.pdf]

## Supporting Information for

### **In-situ utilization of photogenerated hydrogen for hydrogenation reaction over covalent organic framework**

Guang-Bo Wang,<sup>†</sup> Ke-Hui, Xie,<sup>†</sup> Jing-Lan Kan, Hai-Peng Xu, Fei Zhao, Yan-Jing Wang, Yan Geng\* and Yu-Bin Dong\*

College of Chemistry, Chemical Engineering and Materials Science, Collaborative Innovation Center of Functionalized Probes for Chemical Imaging in Universities of Shandong, Key Laboratory of Molecular and Nano Probes, Ministry of Education, Shandong Normal University, Jinan 250014, P. R. China.

<sup>†</sup> These authors contributed equally to this work.

## Materials and methods

All the chemicals were purchased from commercial suppliers and used without further purification unless otherwise noted. The building block of 2,2'-(2',5'-difluoro-[1,1':4',1''-terphenyl]-4,4''-diyl)diacetonitrile (FTPDAN) was synthesized as follows.

$^1\text{H}$  and  $^{13}\text{C}$  NMR spectra were recorded on a Bruker Avance 400 NMR spectrometer. Fourier Transform Infrared (FT-IR) spectra in the region of 800-4000  $\text{cm}^{-1}$  were obtained with a Perkin-Elmer 1600 FT-IR spectrometer. Powder X-ray diffraction (PXRD) data were collected using a D8 ADVANCE X-ray with  $\text{Cu K}_\alpha$  radiation ( $\lambda = 1.05405 \text{ \AA}$ ). Thermogravimetric analysis (TGA) was performed on Mettler Toledo TGA/DSC 3+ with the temperature ranging from 20 to 800  $^\circ\text{C}$  under nitrogen and a heating rate of 10  $^\circ\text{C}/\text{min}$ . Solid state  $^{13}\text{C}$  CP-MAS NMR spectrum was measured at 125.7 MHz using a 4 mm MAS NMR probe with a spinning rate of 8 kHz. Scanning electron microscopy (SEM) images of the **Py-FTP-COF** materials were carried out on a SUB010 scanning electron microscope with acceleration voltage of 20 kV and the transmission electron microscopy (TEM) analysis was performed on a JEOL 2100 Electron Microscope with an operating voltage of 200 kV. Solid state UV-Vis spectra were recorded on a Cary 5000 UV-Vis spectrophotometer (Varian, USA).  $\text{N}_2$  adsorption measurements were performed using an ASAP 2460 apparatus at 77 K, the samples were degassed under high vacuum at 120  $^\circ\text{C}$  for 8h before analysis.

Cyclic voltammetry (CV) measurements were performed on a CHI 660E in a three-electrode electrochemical cell equipped with a salt bridge and a scan rate of 100  $\text{mVs}^{-1}$ . The photocurrent measurements were conducted on a workstation in a standard three-electrode system in dark and light excitation at -0.14 V vs. Ag/AgCl with the photocatalyst-coated FTO as the working electrode, Pt plate as the counter electrode and Ag/AgCl as the reference electrode by directly irradiating the working electrode from the back side using a 300 W Xe lamp and 2M  $\text{Na}_2\text{SO}_4$  aqueous solution was used as the electrolyte. Electrochemical impedance spectroscopy (EIS) analysis was performed at the open circuit condition at -0.14 V vs. Ag/AgCl in the frequency range of 0.01 to 10000 Hz with an AC amplitude of 10 mV.

### Synthesis of 2,2'-(2',5'-difluoro-[1,1':4',1''-terphenyl]-4,4''-diyl)diacetonitrile (FTPDAN)

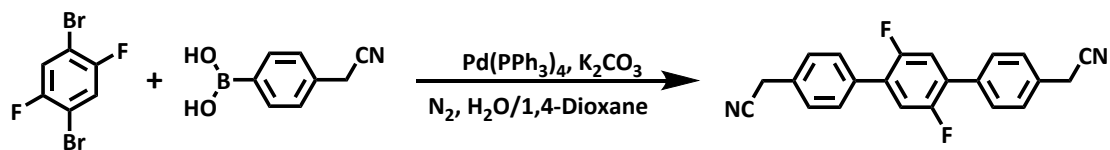

In general, K<sub>2</sub>CO<sub>3</sub> (11.04 mmol, 1.7 g), 1,4-dibromo-2,5-difluorobenzene (3.7 mmol, 1.0 g) and 4-Cyanomethylphenylboronic acid (10.56 mmol, 1.5 g) were introduced into a 250 mL three-necked flask and degassed for three times. Then, degassed H<sub>2</sub>O/anhydrous 1,4-dioxane (1:4, v/v, 125 mL) and Pd(PPh<sub>3</sub>)<sub>4</sub> (0.42 mmol, 0.46 g) were slowly added into the flask under N<sub>2</sub> atmosphere. After reflux for 24h under N<sub>2</sub>, the mixture was poured into distilled water, extracted with chloroform, dried over anhydrous MgSO<sub>4</sub> and evaporated under reduced pressure, giving the crude compound, which was further purified by flash chromatography with dichloromethane as eluent to afford the targeted product as a white powder (0.85 g, 72%). <sup>1</sup>H NMR (400 MHz, DMSO-*d*<sub>6</sub>) δ 7.67 (d, *J* = 8.0 Hz, 4H), 7.58 (t, *J* = 8.9 Hz, 2H), 7.49 (d, *J* = 8.2 Hz, 4H), 4.12 (s, 4H). <sup>13</sup>C NMR (101 MHz, DMSO-*d*<sub>6</sub>) δ 156.89, 154.46, 133.43, 132.12, 129.83, 128.98, 119.59, 118.27, 117.96.

HRMS (ESI) calculated for C<sub>22</sub>H<sub>14</sub>F<sub>2</sub>N<sub>2</sub> [M + Na]: 367.1023, Found: 367.0999.

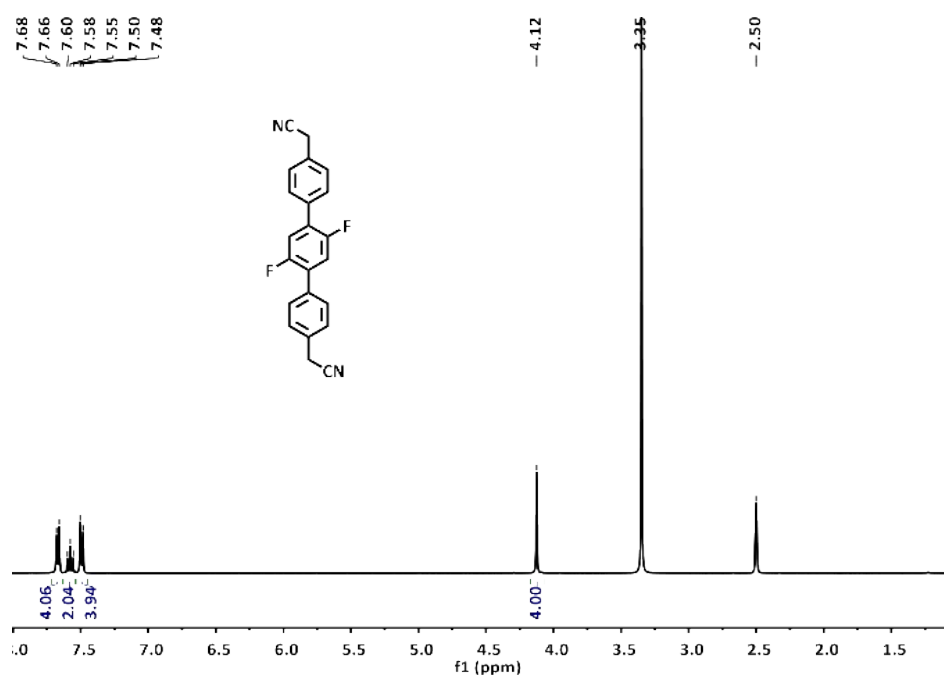

Figure S1. <sup>1</sup>H NMR spectrum of the FTPDAN (DMSO-*d*<sub>6</sub>).

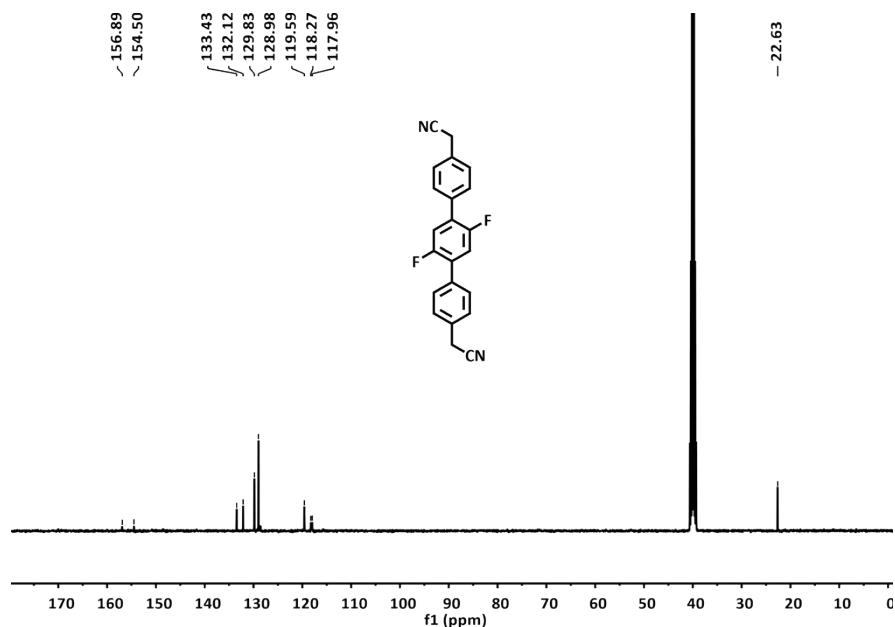

**Figure S2.** <sup>13</sup>C NMR spectrum of the FTPDAN (DMSO-d<sub>6</sub>).

### Synthesis of the Py-FTP-COF

Py-CHO (0.03 mmol, 18.6 mg) and FTPDAN (0.06 mmol, 20.66 mg) was added into a 10 mL Pyrex tube, followed by the addition of 1,2-dichlorobenzene (*o*-DCB, 2 mL), H<sub>2</sub>O (0.1 mL) and TBAH catalyst (1 M in MeOH, 200 μL). Afterwards, the mixture was homogenized by sonication for 5 minutes and the Pyrex tube was flash frozen at 77 K (liquid N<sub>2</sub> bath) and degassed by three-freeze-pump-thaw cycles for three times, sealed under vacuum and then heated at 120 °C for 5 days. After cooling down to room temperature, the precipitate was collected by centrifugation and washed with N, N-dimethylformamide, THF, acetone and dried under vacuum at 100 °C to afford the yellow powders. (35 mg, 90%).

### Photocatalytic H<sub>2</sub> evolution experiments

For a typical H<sub>2</sub> evolution experiment, a Pyrex tube was charged with the activated COF powder (5 mg), 0.1 M ascorbic acid water solution (10 mL) and hexachloroplatinic acid solution as the platinum precursor. After deoxygenation with argon for 30 min, CH<sub>4</sub> gas is injected into the tube as an internal standard to quantify the amount of photogenerated H<sub>2</sub> gas. The system was connected to the device and irradiated with a 300 W Xenon lamp equipped with an under constant agitation and fan cooling for real time quantitative hydrogen detection. The generated H<sub>2</sub> was quantitatively measured by drainage gas-collecting and analyzed by gas chromatography (Fuli, 9790 II (PLF-01)) equipped with a

thermal conductive detector (TCD) and a 5 Å molecular sieve column with argon as the carrier gas. After the photocatalysis experiments, the COF material was recovered by washing with water and acetone then dried under vacuum at 120 °C for multiple runs.

#### Tandem photocatalytic hydrogenation of nitroarenes.

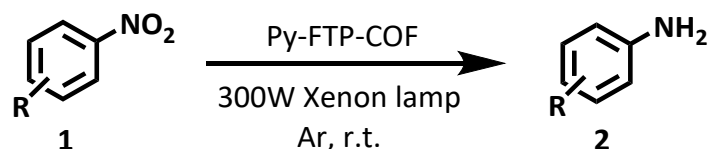

For a typical tandem reaction, a Pyrex tube was charged with the activated **Py-FTP-COF** (5 mg, 15 mol%), nitrobenzene (10.2  $\mu\text{L}$ , 0.1 mmol), 10 mL 0.1 M ascorbic acid water solution and  $\text{CH}_3\text{OH}$  mixture (1:1, v/v) and 4  $\mu\text{L}$  hexachloroplatinic acid solution. After deoxygenation with argon for 20 min, the solution was then thoroughly degassed and irradiated using a Microsolar300 Xe lamp for 4 h. After completion of the reaction, the **Py-FTP-COF** was collected by centrifugation and washed thoroughly with water and methanol, reactivated under vacuum at 100 °C for recycling tests. The solution was concentrated in vacuo, and the residue was purified by column chromatography on silica gel to get the products.

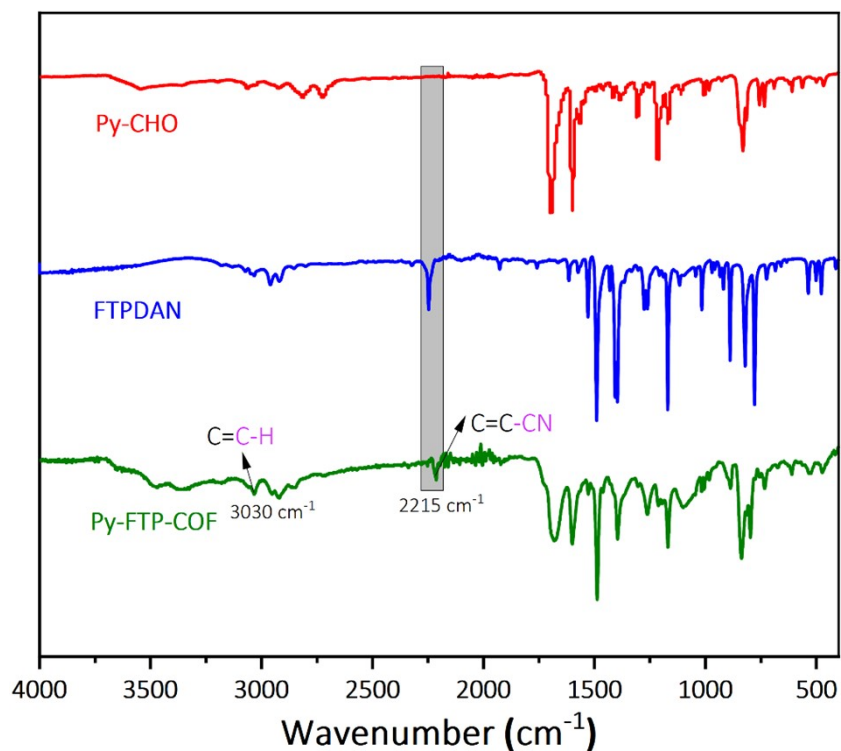

**Figure S3.** FT-IR spectra of Py-CHO (red), FTPDAN (blue) and the **Py-FTP-COF** (green).

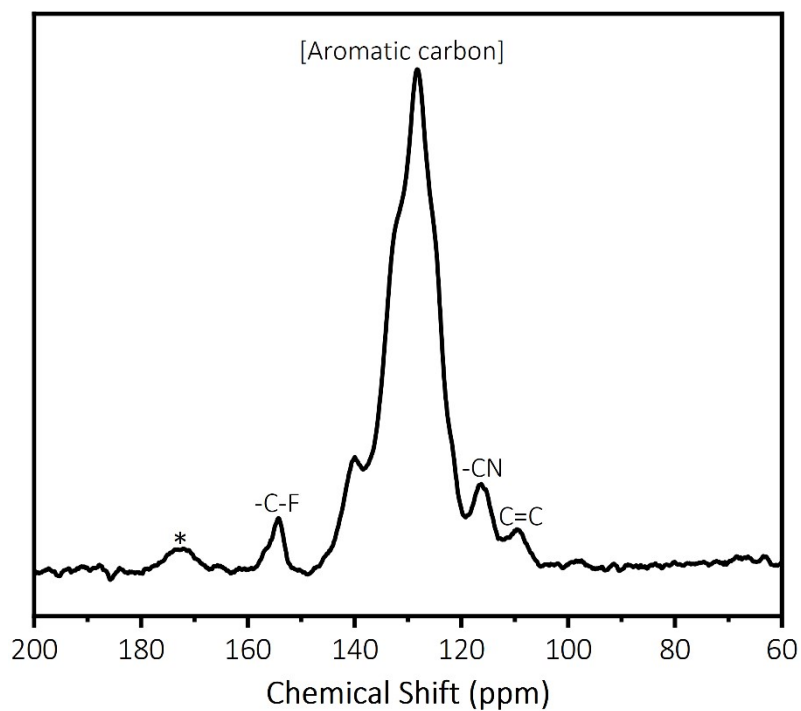

**Figure S4.** The solid state  $^{13}\text{C}$  cross polarization magic angle spinning ( $^{13}\text{C}$  CP/MAS) NMR spectrum of **Py-FTP-COF** (Asterisk is the spinning sideband).

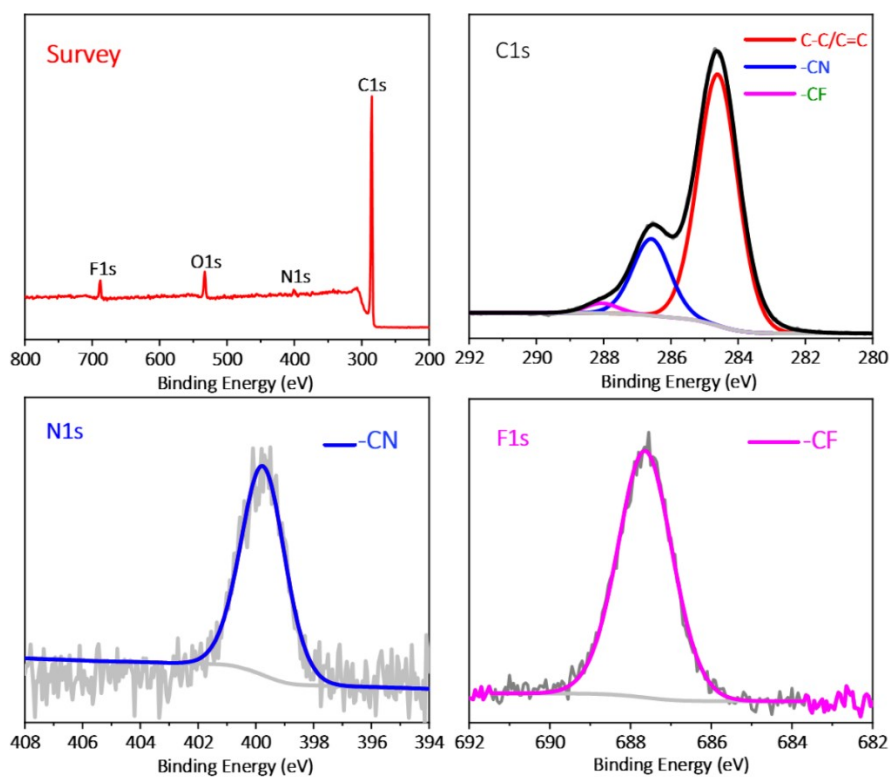

**Figure S5.** XPS spectra of the **Py-FTP-COF**. According to the C1s spectrum, the signals at  $284.5 \pm 0.1$  eV,  $286.1 \pm 0.1$  eV and  $288.1 \pm 0.1$  eV can be ascribed to the olefin carbon, cyano

carbon and C-F carbon, respectively, while the characteristic peaks at  $399.7 \pm 0.1$  eV in the N1s spectrum originating from the cyano groups and at  $687.6 \pm 0.1$  eV arising from the C-F bonds in the F1s spectrum can also be clearly observed.

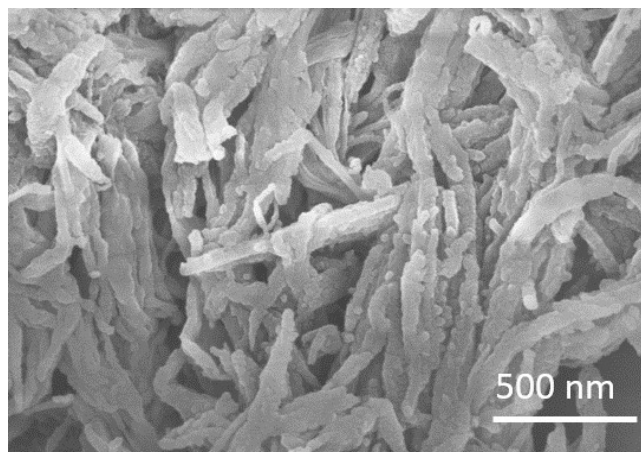

**Figure S6.** Scanning electron microscopy (SEM) image of the **Py-FTP-COF**.

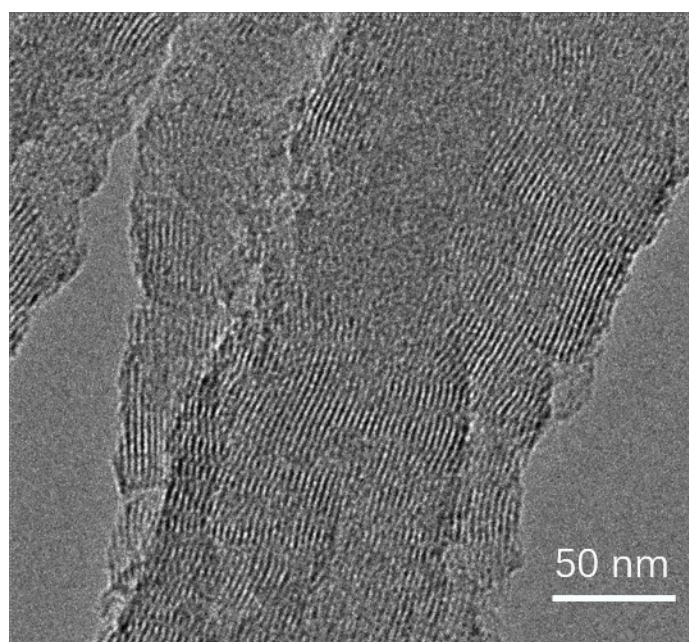

**Figure S7.** Transmission electron microscopy (TEM) image of the **Py-FTP-COF**.

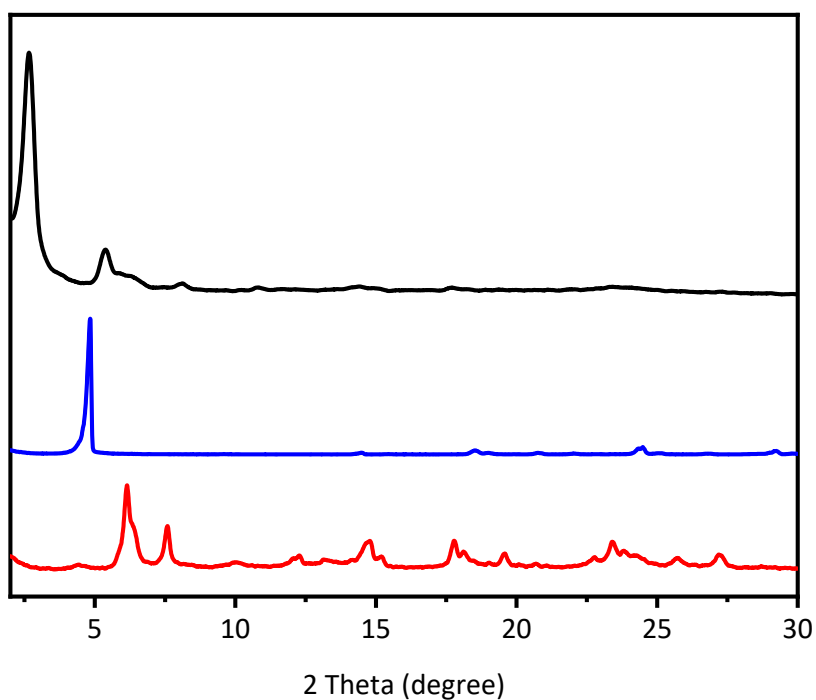

**Figure S8.** Comparison of the PXRD patterns of Py-CHO (red), FTPDAN (blue) and **Py-FTP-COF** (black).

**Table S1.** Fractional atomic coordinates for the unit cell of **Py-FTP-COF** with AA stacking.

| Space group: <i>PM</i>                                                    |         |          |          |
|---------------------------------------------------------------------------|---------|----------|----------|
| $a = 49.7458\text{\AA}$ , $b = 43.8086\text{\AA}$ , $c = 3.843\text{\AA}$ |         |          |          |
| $\alpha = \gamma = 90^\circ$ , $\beta = 91.2723^\circ$                    |         |          |          |
| C1                                                                        | 2.52488 | -1.53262 | -0.05785 |
| C2                                                                        | 2.54878 | -1.51587 | -0.13821 |
| C3                                                                        | 2.47525 | -1.5649  | 0.01151  |
| C4                                                                        | 2.54966 | -1.58446 | -0.02166 |
| C5                                                                        | 2.55094 | -1.61358 | -0.18022 |
| C6                                                                        | 2.57383 | -1.63201 | -0.18595 |
| C7                                                                        | 2.59635 | -1.62179 | -0.03689 |
| C8                                                                        | 2.59526 | -1.59286 | 0.12006  |
| C9                                                                        | 2.57198 | -1.57496 | 0.13811  |
| C10                                                                       | 2.62188 | -1.63961 | -0.06157 |
| C11                                                                       | 2.19762 | -1.78216 | 0.10174  |
| C12                                                                       | 2.22371 | -1.76543 | 0.11202  |
| C13                                                                       | 2.27373 | -1.73438 | 0.12183  |



|     |         |          |          |
|-----|---------|----------|----------|
| C14 | 2.29991 | -1.71761 | 0.11918  |
| C15 | 2.32393 | -1.72918 | -0.06472 |
| C16 | 2.34834 | -1.7137  | -0.06385 |
| C17 | 2.34944 | -1.68561 | 0.11035  |
| C18 | 2.32545 | -1.67358 | 0.28806  |
| C19 | 2.3011  | -1.68945 | 0.29464  |
| C20 | 2.3758  | -1.66985 | 0.11466  |
| C21 | 2.02284 | -1.96744 | 0.05872  |
| C22 | 2.02347 | -1.93502 | 0.03804  |
| C23 | 2.04408 | -1.98413 | 0.17005  |
| C24 | 2.04828 | -1.91638 | 0.06651  |
| C25 | 2.07337 | -1.92484 | -0.11608 |
| C26 | 2.09619 | -1.90669 | -0.10387 |
| C27 | 2.09449 | -1.87894 | 0.07977  |
| C28 | 2.06953 | -1.87043 | 0.26528  |
| C29 | 2.04671 | -1.88875 | 0.25557  |
| C30 | 2.11957 | -1.86074 | 0.09001  |
| C31 | 2.1215  | -1.8299  | 0.07897  |
| C32 | 2.14793 | -1.8138  | 0.08697  |
| C33 | 2.16909 | -1.82703 | 0.2428   |
| C34 | 2.19346 | -1.81148 | 0.25013  |
| C35 | 2.17657 | -1.76911 | -0.05666 |
| C36 | 2.15214 | -1.78445 | -0.06042 |
| C37 | 2.24942 | -1.71814 | 0.1326   |
| C38 | 2.22479 | -1.73328 | 0.13612  |
| C39 | 2.24803 | -1.78166 | 0.10163  |
| C40 | 2.27251 | -1.76658 | 0.11467  |
| F41 | 2.20205 | -1.71618 | 0.17488  |
| F42 | 2.29477 | -1.78381 | 0.13133  |
| C43 | 1.00003 | 1.08043  | 0.97478  |
| C44 | 1       | 1.01632  | 0.9755   |
| C45 | 2.50021 | -1.51634 | -0.03601 |
| C46 | 2.4997  | -1.58005 | 0.03115  |
| C47 | 2.45245 | -1.51587 | -0.07459 |
| C48 | 2.47561 | -1.53256 | -0.02717 |
| C49 | 2.52471 | -1.56504 | -0.01736 |
| C50 | 2.45014 | -1.58407 | 0.03452  |
| C51 | 2.42611 | -1.57545 | 0.24266  |
| C52 | 2.4029  | -1.59342 | 0.25551  |
| C53 | 2.4034  | -1.6214  | 0.07751  |
| C54 | 2.42751 | -1.63056 | -0.12405 |
| C55 | 2.45051 | -1.61217 | -0.14486 |
| C56 | 2.37799 | -1.63919 | 0.08458  |
| C57 | 2.97656 | -1.93501 | -0.08782 |
| C58 | 2.97715 | -1.96744 | -0.1077  |
| C59 | 2.95588 | -1.98413 | -0.21817 |
| C60 | 2.95177 | -1.91635 | -0.1162  |
| C61 | 2.95335 | -1.88876 | -0.3061  |

|      |         |          |          |
|------|---------|----------|----------|
| C62  | 2.93059 | -1.87035 | -0.31478 |
| C63  | 2.90566 | -1.87865 | -0.12655 |
| C64  | 2.90394 | -1.90641 | 0.05731  |
| C65  | 2.9267  | -1.92469 | 0.0678   |
| C66  | 2.88063 | -1.86025 | -0.1331  |
| C67  | 2.87892 | -1.82937 | -0.12632 |
| C68  | 2.85252 | -1.81298 | -0.12916 |
| C69  | 2.84926 | -1.78286 | 0.00019  |
| C70  | 2.82496 | -1.76718 | -0.00001 |
| C71  | 2.80293 | -1.78105 | -0.12683 |
| C72  | 2.80599 | -1.81097 | -0.25833 |
| C73  | 2.83045 | -1.8266  | -0.26297 |
| C74  | 2.77674 | -1.76461 | -0.11708 |
| C75  | 2.77559 | -1.73374 | -0.21774 |
| C76  | 2.75083 | -1.71867 | -0.20325 |
| C77  | 2.72658 | -1.73382 | -0.08688 |
| C78  | 2.72775 | -1.76469 | 0.01427  |
| C79  | 2.75251 | -1.77979 | -0.00173 |
| C80  | 2.7004  | -1.71723 | -0.07083 |
| C81  | 2.69777 | -1.68714 | 0.05747  |
| C82  | 2.67319 | -1.6716  | 0.07498  |
| C83  | 2.65056 | -1.68569 | -0.03734 |
| C84  | 2.65332 | -1.71572 | -0.1674  |
| C85  | 2.67785 | -1.73122 | -0.18454 |
| C86  | 2.62385 | -1.67002 | -0.00871 |
| F87  | 2.79832 | -1.71819 | -0.33815 |
| F88  | 2.70507 | -1.78013 | 0.13942  |
| C89  | 0.90249 | 1.1887   | 0.91329  |
| N90  | 0.92129 | 1.2032   | 0.94586  |
| C91  | 0.60011 | 1.31168  | 1.09261  |
| N92  | 0.58117 | 1.29695  | 1.17394  |
| C93  | 0.39877 | 1.31159  | 1.16747  |
| N94  | 0.4171  | 1.29669  | 1.21046  |
| C95  | 0.09821 | 1.18835  | 1.0307   |
| N96  | 0.07964 | 1.20299  | 0.99127  |
| H97  | 2.56795 | -1.5268  | -0.20798 |
| H98  | 2.53455 | -1.62183 | -0.31193 |
| H99  | 2.61225 | -1.58442 | 0.23882  |
| H100 | 2.5715  | -1.55374 | 0.28023  |
| H101 | 2.64018 | -1.62643 | -0.11993 |
| H102 | 2.32394 | -1.74984 | -0.21856 |
| H103 | 2.36636 | -1.72341 | -0.20758 |
| H104 | 2.32563 | -1.65243 | 0.43339  |
| H105 | 2.28335 | -1.67992 | 0.44608  |
| H106 | 2.06084 | -1.97289 | 0.2649   |
| H107 | 2.07533 | -1.94531 | -0.27406 |
| H108 | 2.11517 | -1.914   | -0.24669 |
| H109 | 2.06768 | -1.85017 | 0.42737  |

|      |         |          |          |
|------|---------|----------|----------|
| H110 | 2.02788 | -1.88147 | 0.40156  |
| H111 | 2.13782 | -1.87402 | 0.0824   |
| H112 | 2.16667 | -1.84898 | 0.3718   |
| H113 | 2.20867 | -1.82217 | 0.38423  |
| H114 | 2.1791  | -1.74736 | -0.18957 |
| H115 | 2.13679 | -1.77348 | -0.18978 |
| H116 | 2.2493  | -1.69345 | 0.13789  |
| H117 | 2.24829 | -1.8063  | 0.08293  |
| H118 | 1.00004 | 1.10513  | 0.97437  |
| H119 | 2.49919 | -1.60434 | 0.08387  |
| H120 | 2.43395 | -1.52693 | -0.11568 |
| H121 | 2.4252  | -1.55483 | 0.39758  |
| H122 | 2.38459 | -1.58577 | 0.41224  |
| H123 | 2.42833 | -1.65125 | -0.27877 |
| H124 | 2.46847 | -1.61959 | -0.31067 |
| H125 | 2.35997 | -1.62594 | 0.06755  |
| H126 | 2.9391  | -1.97288 | -0.31243 |
| H127 | 2.97217 | -1.88159 | -0.45344 |
| H128 | 2.93245 | -1.85017 | -0.47816 |
| H129 | 2.88498 | -1.9136  | 0.20199  |
| H130 | 2.92472 | -1.94514 | 0.2262   |
| H131 | 2.86229 | -1.87342 | -0.11831 |
| H132 | 2.86538 | -1.77133 | 0.10865  |
| H133 | 2.82327 | -1.74436 | 0.1077   |
| H134 | 2.78958 | -1.82208 | -0.36532 |
| H135 | 2.83202 | -1.84909 | -0.37942 |
| H136 | 2.7506  | -1.69512 | -0.28832 |
| H137 | 2.75276 | -1.80333 | 0.08379  |
| H138 | 2.71459 | -1.67586 | 0.15298  |
| H139 | 2.67175 | -1.64889 | 0.18656  |
| H140 | 2.63647 | -1.7272  | -0.26006 |
| H141 | 2.67923 | -1.75407 | -0.29197 |
| H142 | 0.57427 | 1.34639  | 0.67783  |

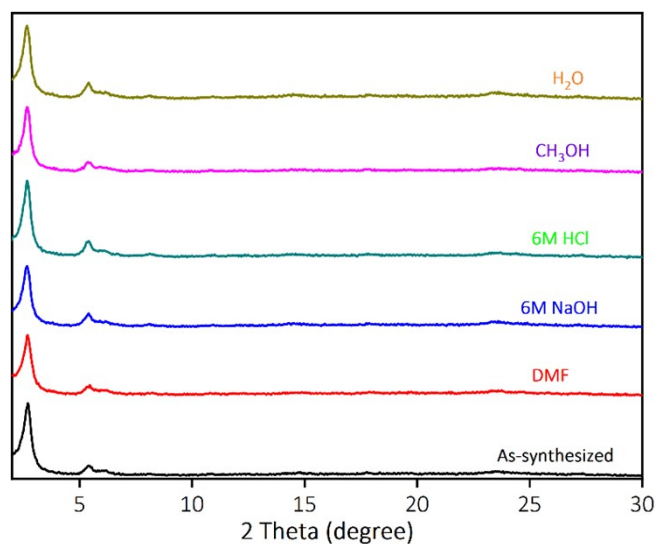

**Figure S9.** PXRD patterns of the **Py-FTP-COF**: as synthesized, immersed in DMF, 6M NaOH, 6M HCl,  $CH_3OH$  and  $H_2O$ , respectively.

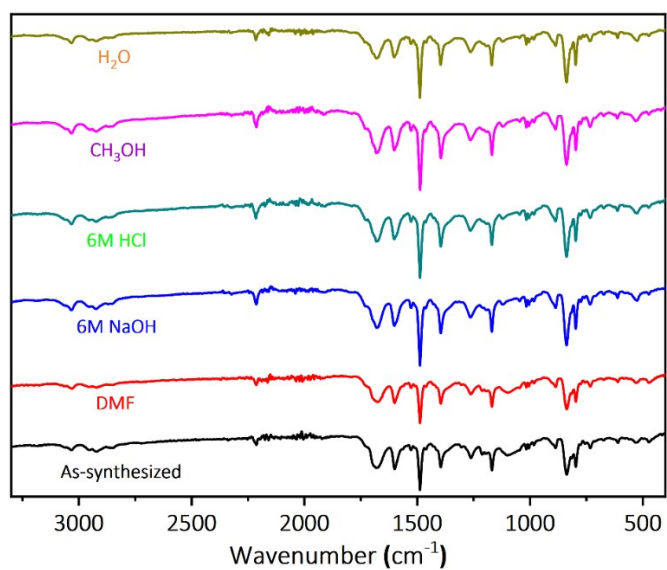

**Figure S10.** FT-IR spectra of the **Py-FTP-COF**: as synthesized, immersed in DMF, 6M NaOH, 6M HCl,  $CH_3OH$  and  $H_2O$ , respectively.

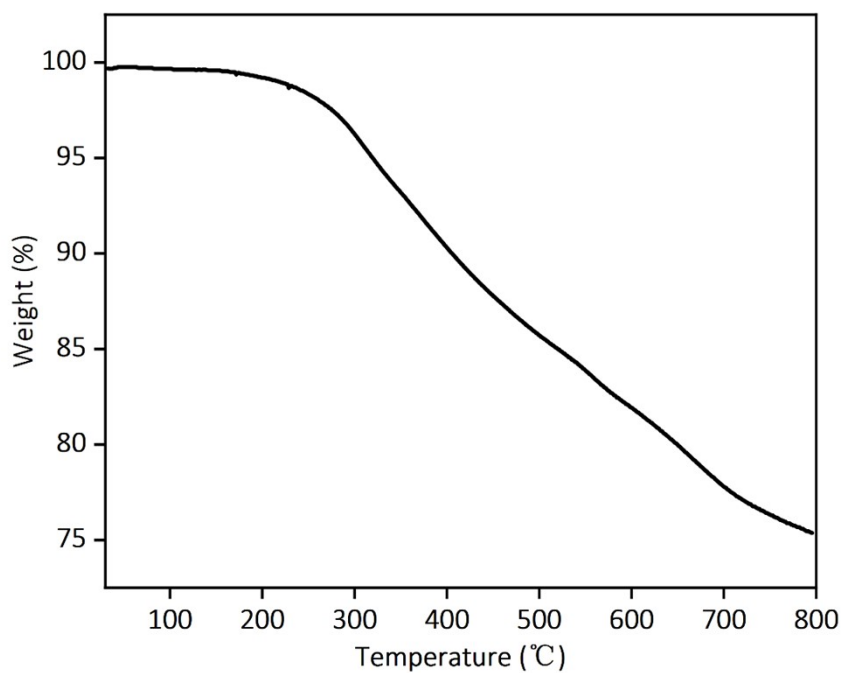

**Figure S11.** Thermogravimetric analysis (TGA) curve of **Py-FTP-COF** measured under nitrogen flow with a heating rate 10 °C/min up to 800 °C.

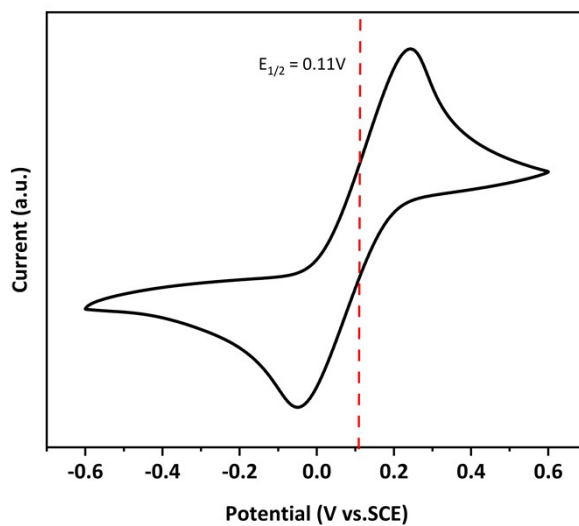

**Figure S12.** Cyclic voltammetry measurements of ferrocene/ferrocenium couple to calibrate the pseudo reference electrode ( $E_{1/2}$  is obtained to be 0.11 V).

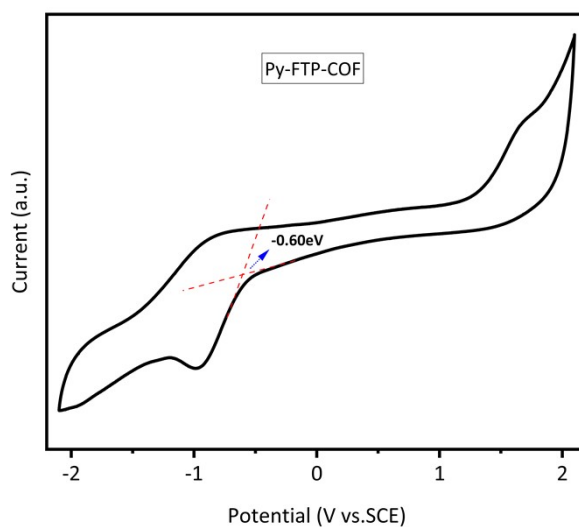

**Figure S13.** Cyclic voltammetry plot of **Py-FTP-COF** referenced to saturated calomel (SCE) using ferrocene (Fc) as an internal standard at a scan rate of  $100 \text{ mV S}^{-1}$ . The calculation of the  $E_{\text{HOMO}}$  and  $E_{\text{LUMO}}$  is according to the following equations:

$$E_{\text{LUMO}} = - (E_{\text{onset vs. SCE}} - E_{1/2, \text{Fc}} + 4.8) \text{ eV}$$

$$E_{\text{HOMO}} = E_{\text{LUMO}} - E_{g, \text{opt}}$$

Where,  $E_{1/2, \text{Fc}}$  is obtained to be 0.11 vs. SCE., reduction onset potential ( $E_{\text{onset vs. SCE}}$ ) was extracted from the X-intercept of the linear fit in the voltammogram,  $E_{g, \text{opt}}$  is obtained from the UV-Vis spectrum by using Tauc-plot method.

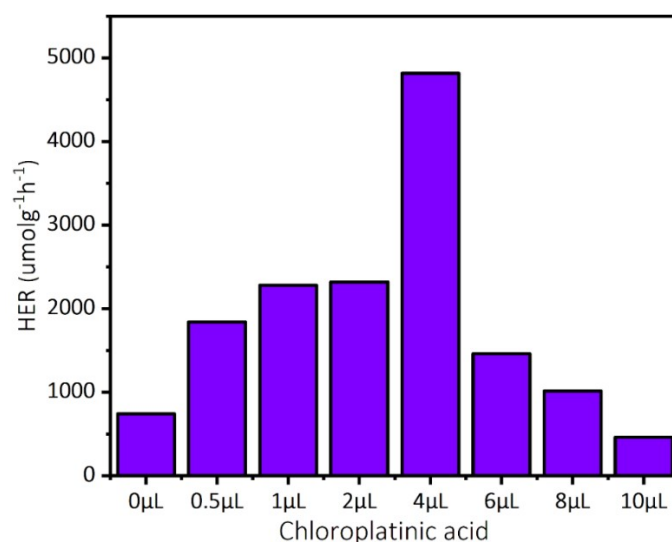

**Figure S14.** Hydrogen evolution rate versus the amount of the co-catalyst (5 mg Py-FTP-COF, 10 mL ascorbic acid water solution (0.1 M), different volumes of the H<sub>2</sub>PtCl<sub>4</sub> precursor in 2h under 300 W Xe lamp irradiation). The HER in 2h gradually enhanced with the increase of the amount of the Pt precursor and reached the maximum when 4 μL H<sub>2</sub>PtCl<sub>6</sub> was introduced, thus, the detailed photocatalytic reactions were performed under this optimized condition.

**Table S2** The summary of the photocatalytic H<sub>2</sub> evolution performance under visible light irradiation over different types of COFs

| COFs                                  | Band gap (eV) | Co-catalyst | Sacrificial agent               | HER (μmol g <sup>-1</sup> h <sup>-1</sup> ) | Ref. |
|---------------------------------------|---------------|-------------|---------------------------------|---------------------------------------------|------|
| g-C <sub>40</sub> N <sub>3</sub> -COF | 2.36          | Pt          | Na <sub>2</sub> S               | 4                                           | 1    |
| TA-COF                                | 2.82          | Pt          | TEOA                            | 10                                          | 2    |
| g-C <sub>40</sub> N <sub>3</sub> -COF | 2.36          | Pt          | TEA                             | 12                                          | 1    |
| g-C <sub>40</sub> N <sub>3</sub> -COF | 2.36          | Pt          | Na <sub>2</sub> SO <sub>3</sub> | 14                                          | 1    |
| N <sub>0</sub> -COF                   | 2.6-2.7       | Pt          | TEOA                            | 23                                          | 3    |
| TpPa-2-COF                            | 2.52          | Pt          | Lactic acid                     | 28                                          | 4    |
| g-C <sub>40</sub> N <sub>3</sub> -COF | 2.36          | Pt          | EtOH                            | 56                                          | 1    |
| TpPa-2                                | 2.07          | Pt          | Sodium ascorbate                | 72.09                                       | 5    |
| COF-923                               | 1.74          | Pt          | TEOA                            | 73                                          | 6    |
| g-C <sub>33</sub> N <sub>3</sub> -COF | 2.54          | Pt          | Ascorbic acid                   | 74                                          | 7    |
| BE-COF                                | 2.12          | Pt          | Ascorbic acid                   | 76                                          | 8    |
| TFA-COF                               | 2.40          | Pt          | TEOA                            | 80                                          | 2    |
| PTP-COF                               | 2.1           | Pt          | TEOA                            | 83.83                                       | 9    |
| N <sub>1</sub> -COF                   | 2.6-2.7       | Pt          | TEOA                            | 90                                          | 3    |
| N <sub>1</sub> -COF                   | -             | Co-1        | TEOA                            | 100                                         | 10   |
| COF-932                               | -             | Pt          | TEOA                            | 110                                         | 6    |
| CTP-1                                 | 2.96          | Pt          | TEOA                            | 120                                         | 11   |
| sp <sup>2</sup> c-CMP                 | 1.96          | Pt          | TEOA                            | 140                                         | 12   |
| TTR-COF                               | 2.71          | Au          | TEOA                            | 141                                         | 13   |
| TTB-COF                               | 2.8           | Au          | TEOA                            | 145.25                                      | 13   |
| N <sub>3</sub> -COF                   | -             | Co-1        | TEOA                            | 163                                         | 10   |
| OB-POP-1                              | 2.21          | Pt          | TEOA                            | 168                                         | 14   |

|                                                        |         |                                         |                  |              |    |
|--------------------------------------------------------|---------|-----------------------------------------|------------------|--------------|----|
| CTF-1                                                  | 2.23    | Pt                                      | TEOA             | 168          | 15 |
| B-CTF-1                                                | 2.14    | Pt                                      | TEOA             | 179          | 15 |
| TpPa-COF-NO <sub>2</sub>                               | 1.92    | Pt                                      | Sodium ascorbate | 220          | 16 |
| COF-42                                                 | -       | Co-1                                    | TEOA             | 233          | 10 |
| g-C <sub>18</sub> N <sub>3</sub> -COF                  | 2.42    | Pt                                      | Ascorbic acid    | 292          | 7  |
| TP-BDDA                                                | 2.31    | Pt                                      | TEOA             | 324 ± 10     | 17 |
| CTF-15                                                 | 2.58    | Pt                                      | TEOA             | 352          | 18 |
| TBC-COF                                                | -       | Pt                                      | TEOA             | 360          | 15 |
| N <sub>2</sub> -COF                                    | -       | Co-2 <sup>b</sup>                       | TEOA             | 414          | 10 |
| PyTA-BC-Ph                                             | 2.67    |                                         | Ascorbic acid    | 417          | 19 |
| PMDA-COF                                               | 1.99    | Pt                                      | TEOA             | 435.6        | 20 |
| N <sub>2</sub> -COF                                    | 2.6-2.7 | Pt                                      | TEOA             | 438          | 3  |
| CTP <sub>300</sub>                                     | 2.36    | Pt                                      | TEOA             | 500          | 11 |
| TAB-TFP-COF                                            | 2.45    | Pt                                      | Ascorbic acid    | 666.4        | 21 |
| COF-932                                                | -       | Pt                                      | Ascorbic acid    | 730          | 6  |
| BtCOF150                                               | 2.10    | Pt                                      | TEOA             | 750 ± 25     | 22 |
| N <sub>2</sub> -COF                                    | -       | Co-1 <sup>a</sup>                       | TEOA             | 782          | 10 |
| OB-POP-2                                               | 2.28    | Pt                                      | TEOA             | 940          | 14 |
| TpDTz COF                                              | 2.07    | NiME                                    | TEOA             | 941          | 23 |
| BT-TAPT-COF                                            | 2.35    | Pt                                      | Ascorbic acid    | 946          | 24 |
| PyTA-BC                                                | 2.71    |                                         | Ascorbic acid    | 1183         | 19 |
| TpPa-1-COF                                             | 2.02    | Pt                                      | Sodium ascorbate | 1223         | 25 |
| sp <sup>2</sup> c-COF                                  | 1.9     | Pt                                      | TEOA             | 1360         | 12 |
| BDF-TAPT-COF                                           | 2.57    | Pt                                      | Ascorbic acid    | 1390         | 26 |
| TpPa-COF                                               | 2.09    | Pt                                      | Sodium ascorbate | 1560         | 16 |
| TP-COF                                                 | 2.28    | Pt                                      | Ascorbic acid    | 1600(±80)    | 27 |
| N <sub>3</sub> -COF                                    | 2.6-2.7 | Pt                                      | TEOA             | 1703         | 3  |
| Ni(OH) <sub>2</sub> -<br>2.5%/TpPa-2                   | -       | Ni(OH) <sub>2</sub>                     | Sodium ascorbate | 1895.99      | 5  |
| TFPT-COF                                               | 2.8     | Pt                                      | TEOA             | 1970         | 28 |
| PyTz-COF                                               | 2.20    | Pt                                      | Ascorbic acid    | 2072.4       | 29 |
| sp <sup>2</sup> c-COF <sub>ERDN</sub>                  | 1.85    | Pt                                      | TEOA             | 2120         | 12 |
| g-C <sub>54</sub> N <sub>6</sub> -COF                  | 2.03    | Pt                                      | TEOA             | 2518.9       | 30 |
| g-C <sub>40</sub> N <sub>3</sub> -COF                  | 2.36    | Pt                                      | TEOA             | 2596         | 1  |
| Py-FTP-BTCOF                                           | 2.34    | Pt                                      | Ascorbic acid    | 2875         | 31 |
| TpPa-COF-CH <sub>3</sub>                               | 2.10    | Pt                                      | Sodium ascorbate | 3070         | 16 |
| α-Fe <sub>2</sub> O <sub>3</sub> /TpPa-<br>2-COF (3:7) | 2.07    | Pt                                      | Sodium ascorbate | 3770         | 32 |
| CdS-COF (90:10)                                        | -       | Pt                                      | Lactic acid      | 3678         | 4  |
| S-COF                                                  | 2.10    | Pt                                      | Ascorbic acid    | 4440 (±140)  | 26 |
| TpPa-1                                                 | 2.11    | Pt                                      | Ascorbic acid    | 5479         | 33 |
| MoS <sub>2</sub> -3%/TpPa-<br>1-COF                    | 2.14    | MoS <sub>2</sub>                        | Ascorbic acid    | 5585         | 33 |
| TpPa-COF-<br>(CH <sub>3</sub> ) <sub>2</sub>           | 2.06    | Pt                                      | Sodium ascorbate | 8330         | 16 |
| TP-COF                                                 | 1.97    | PVP-Pt                                  | Ascorbic acid    | 8420         | 8  |
| Py-CITP-BT-COF                                         | 2.36    | Pt                                      | Ascorbic acid    | 8875         | 31 |
| CN-COF                                                 | 2.09    | Pt                                      | TEOA             | 10100        | 34 |
| TiO <sub>2</sub> -TpPa-1-<br>COF (1:3)                 | 2.15    | Pt                                      | Sodium ascorbate | 11190        | 35 |
| rGO(5%)-TpPa-<br>1-COF                                 | 2.06    | Pt                                      | Sodium ascorbate | 11980        | 36 |
| FS-COF                                                 | 1.85    | Pt                                      | Ascorbic acid    | 10100(±300)  | 26 |
| Mo <sub>3</sub> S <sub>13</sub> @EB-<br>COF            | -       | Ru(bpy) <sub>3</sub><br>Cl <sub>2</sub> | Ascorbic acid    | 13215        | 37 |
| FS-COF+W55F                                            | -       | Pt                                      | Ascorbic acid    | 16300 (±290) | 26 |
| USTB-10                                                | 1.52    | Pt                                      | Ascorbic acid    | 21800        | 38 |
| COF-923                                                | -       | Pt                                      | Ascorbic acid    | 23400        | 6  |
| NH <sub>2</sub> -UiO-<br>66/TpPa-1-COF<br>(4:6)        | 2.10    | Pt                                      | Sodium ascorbate | 23413        | 25 |
| WO <sub>3</sub> @TpPa-1-<br>COF/rGo (30%)              | 2.11    | Pt                                      | Ascorbic acid    | 26730        | 39 |



|                                       |      |    |               |        |    |
|---------------------------------------|------|----|---------------|--------|----|
| Tp-2C/BPy <sup>2+</sup> -COF (19.10%) |      | Pt | Ascorbic acid | 34600  | 40 |
| Cu-salphen-HDCOF-NSs+FS               | 1.62 |    | TEA           | 36990  | 41 |
| COF-JLU100                            | 1.4  | Pt | TEOA          | 107380 | 42 |

<sup>a</sup> Co-1: [Co(dmgH)<sub>2</sub>pyCl]; <sup>b</sup>Co-2: [Co(dmgBF<sub>2</sub>)<sub>2</sub>(OH)<sub>2</sub>]; <sup>c</sup> PE: Photonic efficiency; TEOA: Triethanolamine; TEA: Triethylamine.

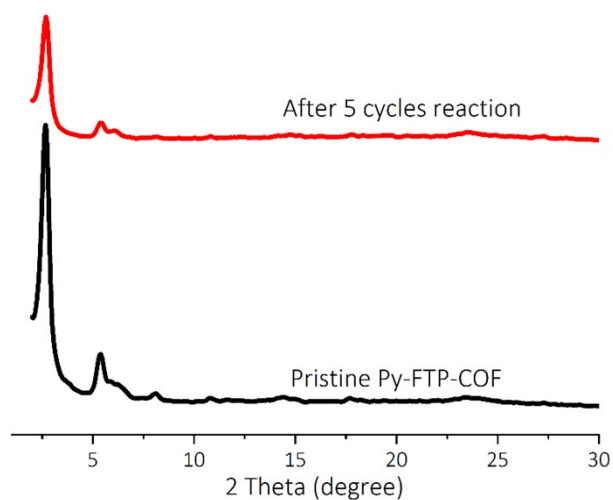

**Figure S15.** PXRD patterns of the **Py-FTP-COF** before and after 5 cycles reactions.

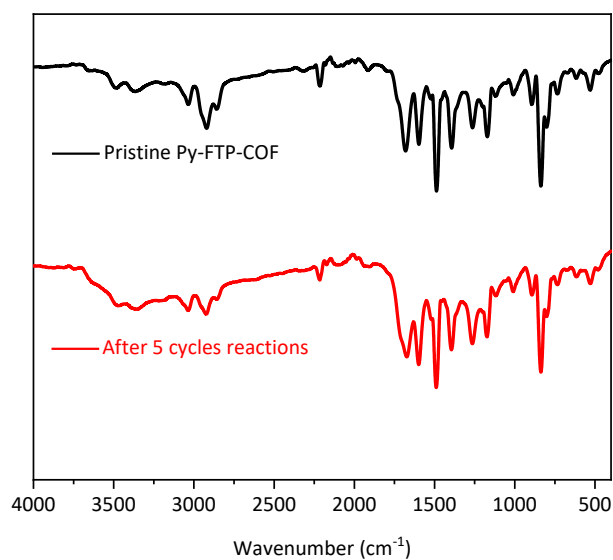

**Figure S16.** FT-IR spectra of the **Py-FTP-COF** before and after 5 cycles reactions.

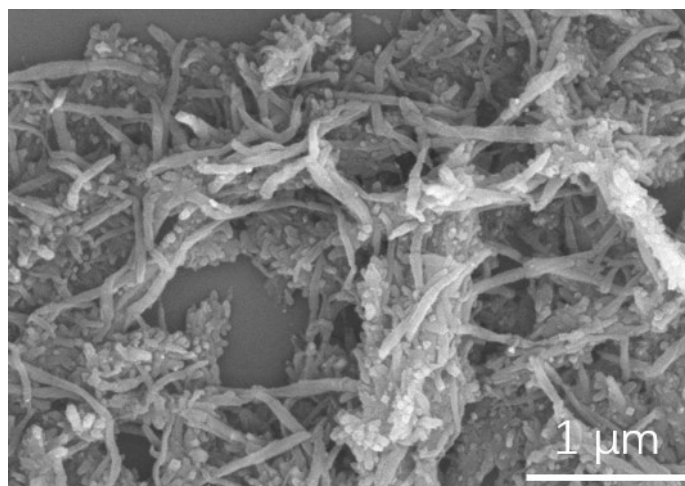

**Figure S17.** SEM images of the **Py-FTP-COF** after 5 cycles photocatalytic hydrogen evolution.

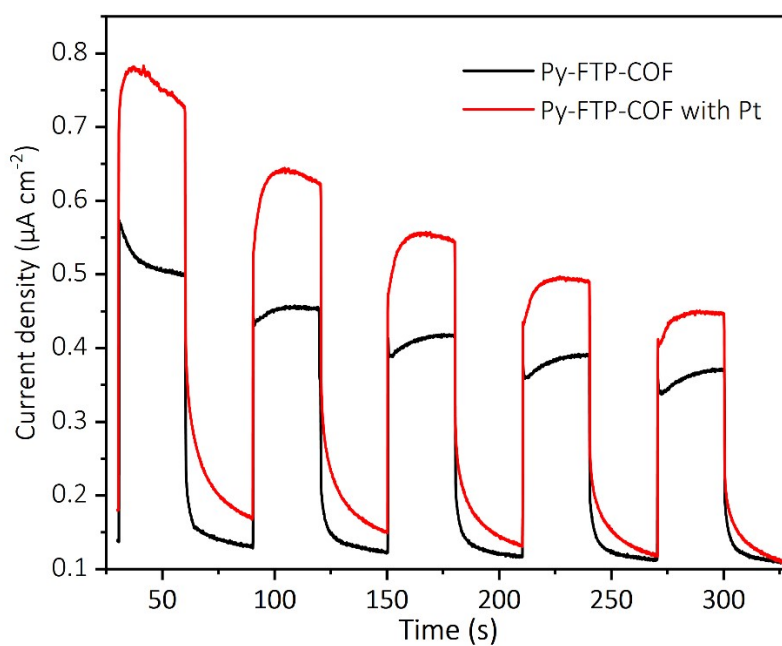

**Figure S18.** Photocurrent responses (i-t) of the **Py-FTP-COF** photocatalysts in the presence or absence of the Pt co-catalyst.

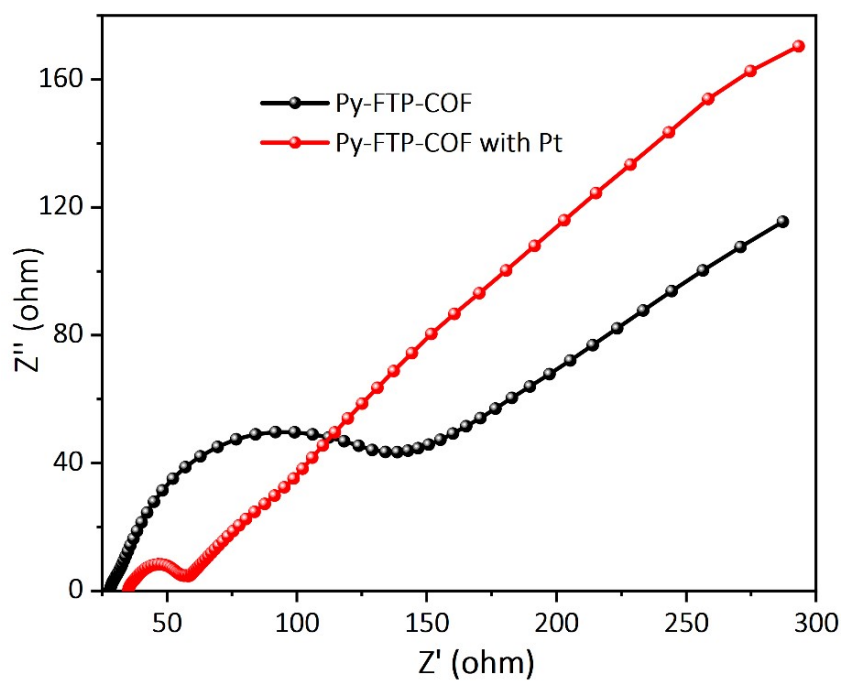

**Figure S19.** Electrochemical impedance spectroscopy (EIS) Nyquist plots of the **Py-FTP-COF** with and without the Pt co-catalyst.

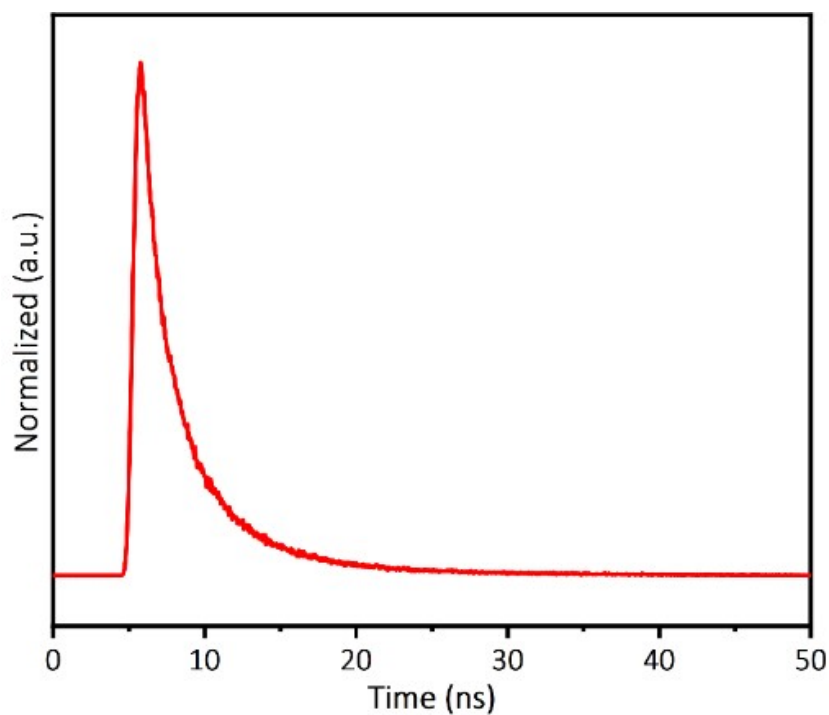

**Figure S20.** Time-resolved photoluminescence (TRPL) spectrum of the **Py-FTP-COF**. The sample was excited with a 405 nm laser and emission was measured at 630 nm.

**Table S3.** Optimization of the reaction conditions for the hydrogenation of nitrobenzene catalyzed by **Py-FTP-COF**.

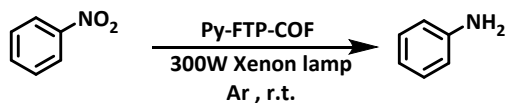

| Entry | Py-FTP-COF (mol %) | Solvent (10 mL)                                          | H <sub>2</sub> PtCl <sub>6</sub> (μL) | Time (h) | Yield (%) |
|-------|--------------------|----------------------------------------------------------|---------------------------------------|----------|-----------|
| 1     | 15                 | H <sub>2</sub> A <sup>a</sup> : CH <sub>3</sub> OH (3:1) | 4                                     | 4        | 20        |
| 2     | 15                 | H <sub>2</sub> A : CH <sub>3</sub> OH (1:1)              | 4                                     | 4        | 85        |
| 3     | 15                 | H <sub>2</sub> A : CH <sub>3</sub> OH (1:3)              | 4                                     | 4        | Trace     |
| 4     | 15                 | H <sub>2</sub> A : Acetone (1:1)                         | 4                                     | 4        | 60        |
| 5     | 15                 | H <sub>2</sub> A : Ethanol (1:1)                         | 4                                     | 4        | 52        |
| 6     | 15                 | H <sub>2</sub> A : CH <sub>3</sub> CN (1:1)              | 4                                     | 4        | Trace     |
| 7     | 15                 | H <sub>2</sub> A : CH <sub>3</sub> OH (1:1)              | 4                                     | 2        | 35        |
| 8     | 15                 | H <sub>2</sub> A : CH <sub>3</sub> OH (1:1)              | 8                                     | 4        | 22        |
| 9     | 15                 | H <sub>2</sub> A : CH <sub>3</sub> OH (1:1)              | 4                                     | 6        | 82        |
| 10    | 15                 | H <sub>2</sub> A : CH <sub>3</sub> OH (1:1)              | 2                                     | 4        | 47        |
| 11    | --                 | H <sub>2</sub> A : CH <sub>3</sub> OH (1:1)              | 4                                     | 4        | Trace     |
| 12    | 15                 | H <sub>2</sub> A : CH <sub>3</sub> OH (1:1)              | --                                    | 4        | Trace     |
| 13    | 30                 | H <sub>2</sub> A : CH <sub>3</sub> OH (1:1)              | 8                                     | 4        | 81        |
| 14    | 6                  | H <sub>2</sub> A : CH <sub>3</sub> OH (1:1)              | 2                                     | 4        | 54        |
| 15    | 15 (blue LED)      | H <sub>2</sub> A : CH <sub>3</sub> OH (1:1)              | 4                                     | 4        | 25        |
| 16    | 15 (Green LED)     | H <sub>2</sub> A : CH <sub>3</sub> OH (1:1)              | 4                                     | 4        | 38        |
| 17    | 15 (0.05mmol NB)   | H <sub>2</sub> A : CH <sub>3</sub> OH (1:1)              | 4                                     | 4        | 85        |
| 18    | 15 (0.2mmol NB)    | H <sub>2</sub> A : CH <sub>3</sub> OH (1:1)              | 4                                     | 4        | 65        |

a: H<sub>2</sub>A, 0.1 M ascorbic acid water solution; NB: Nitrobenzene

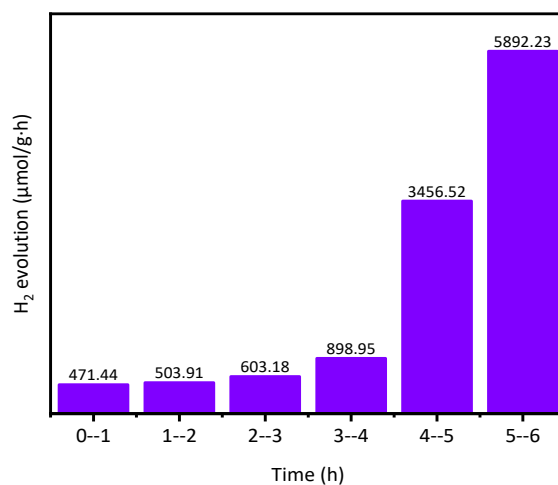

**Figure S21.** Photocatalytic hydrogen evolution performance of the **Py-FTP-COF** in the presence of nitrobenzene under 300 W Xe lamp irradiation.

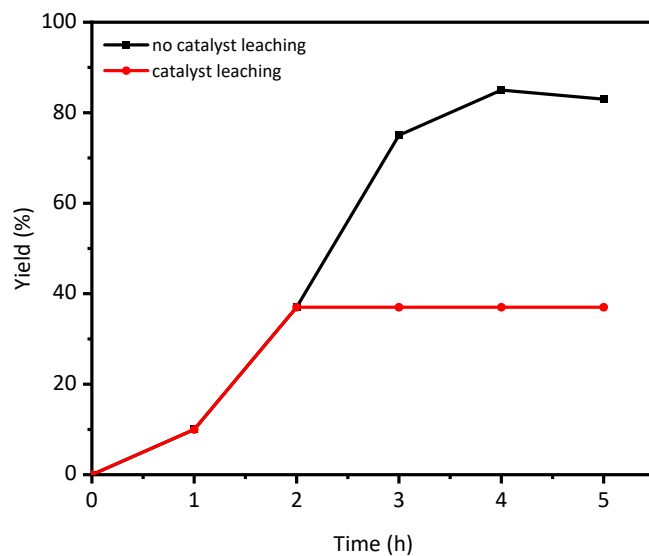

**Figure S22.** Reaction time examination (black line) and leaching test (red line). The solid catalyst was filtrated from the reaction solution after 2 h, and the filtrate was transferred to a new vial and the reaction was carried out under the same conditions for another 3 h.

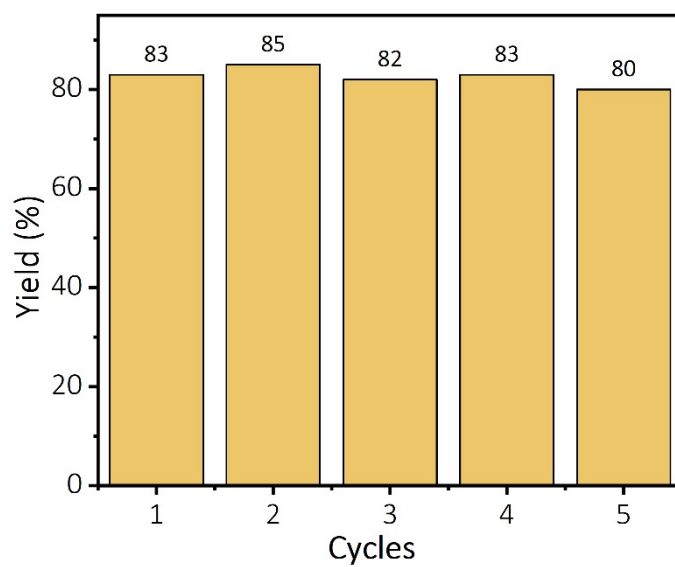

**Figure S23.** Assessment of the reusability of Py-FTP-COF for the hydronation reactions and keep good catalytic effect in 5 cycles.

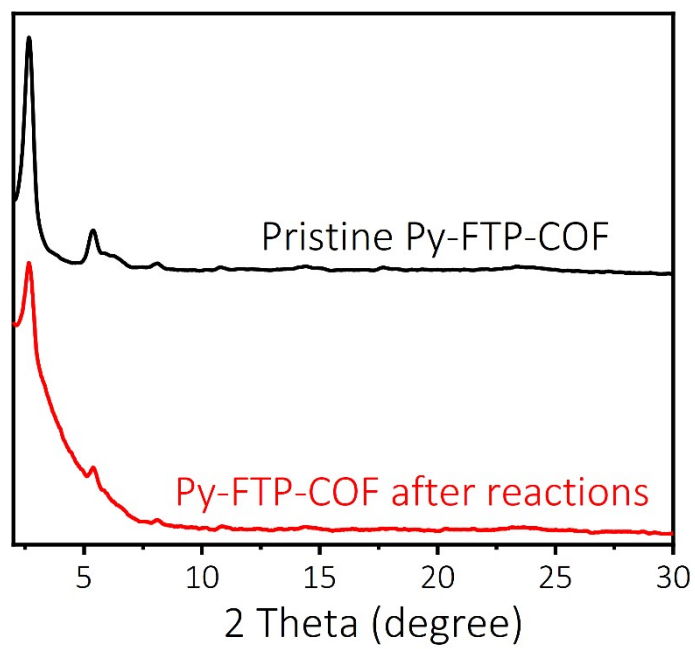

**Figure S24.** Comparison of the PXRD patterns of **Py-FTP-COF** before and after hydrogenation reactions.

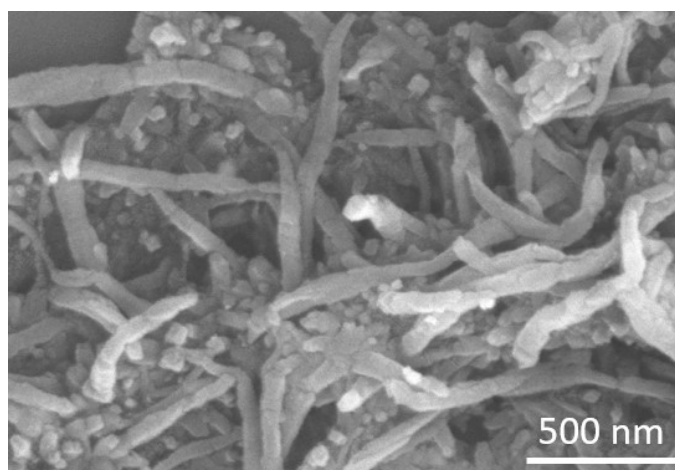

**Figure S25.** SEM image of the **Py-FTP-COF** after 5 catalytic cycles.

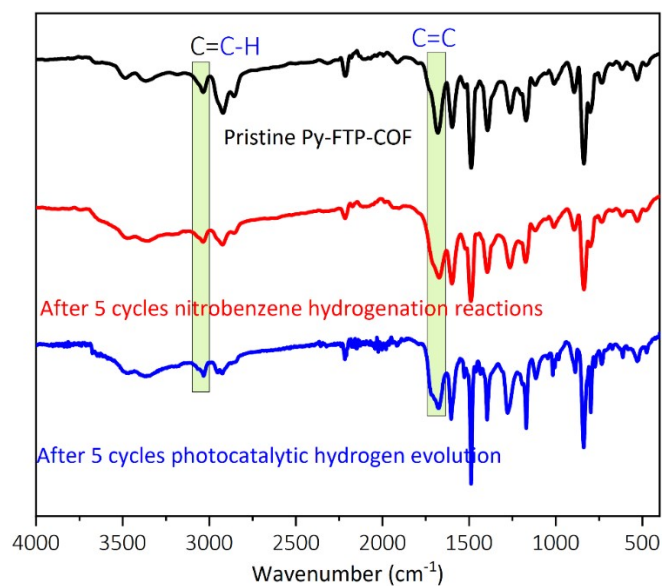

**Figure S26.** Comparison of the FT-IR spectra of the pristine **Py-FTP-COF** (black), after 5 cycles photocatalytic hydrogen evolution (blue), and after 5 cycles nitrobenzene hydrogenation reactions (red). The characteristic peaks at  $3030\text{ cm}^{-1}$  (C=C-H) and  $1660\text{ cm}^{-1}$  (C=C) together with the cyano groups ( $2215\text{ cm}^{-1}$ ) were well reserved, confirming that the cyano-vinylene-linkages of the frameworks was not reduced in our case.

### Characterization data for all compounds.

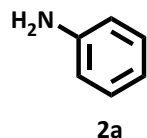

#### Aniline (2a) :

The product is isolated by column chromatography on silica gel as transparent liquid (isolated yield: 85%),  $R_f$  (petroleum ether/ethyl acetate 5:1) = 0.4,  $^1\text{H NMR}$  (400 MHz,  $\text{DMSO-}d_6$ )  $\delta$  6.99 (t,  $J = 7.8\text{ Hz}$ , 2H), 6.63 – 6.41 (m, 3H), 4.98 (s, 2H).  $^{13}\text{C NMR}$  (101 MHz, Chloroform- $d$ )  $\delta$  146.40, 129.33, 118.61. HRMS (ESI) calculated for  $\text{C}_6\text{H}_7\text{NNa}$  [M + Na]: 116.0476, Found: 116.0472.

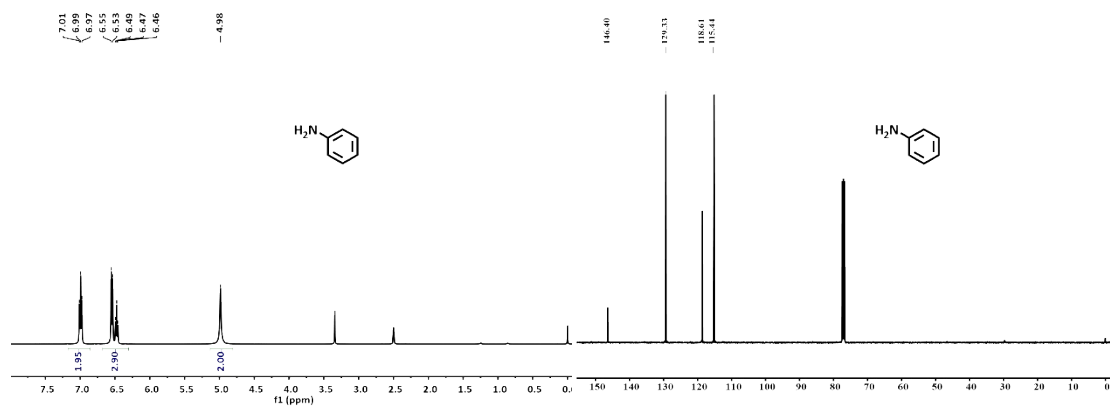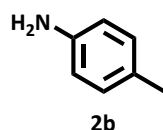

### p-Toluidine (2b) :

The product is isolated by column chromatography on silica gel as colorless solid (isolated yield: 91%),  $R_f$  (petroleum ether/ethyl acetate 5:1) = 0.4,  $^1\text{H NMR}$  (400 MHz,  $\text{DMSO-}d_6$ )  $\delta$  6.81 (d,  $J = 8.0$  Hz, 2H), 6.46 (dd, 2H), 4.77 (s, 3H), 2.11 (s, 2H).  $^{13}\text{C NMR}$  (101 MHz,  $\text{Chloroform-}d$ )  $\delta$  143.77, 129.77, 127.86, 115.30, 20.45. HRMS (ESI) calculated for  $\text{C}_7\text{H}_{10}\text{N}$  [ $\text{M} + \text{H}$ ]: 108.0813, Found: 108.0802.

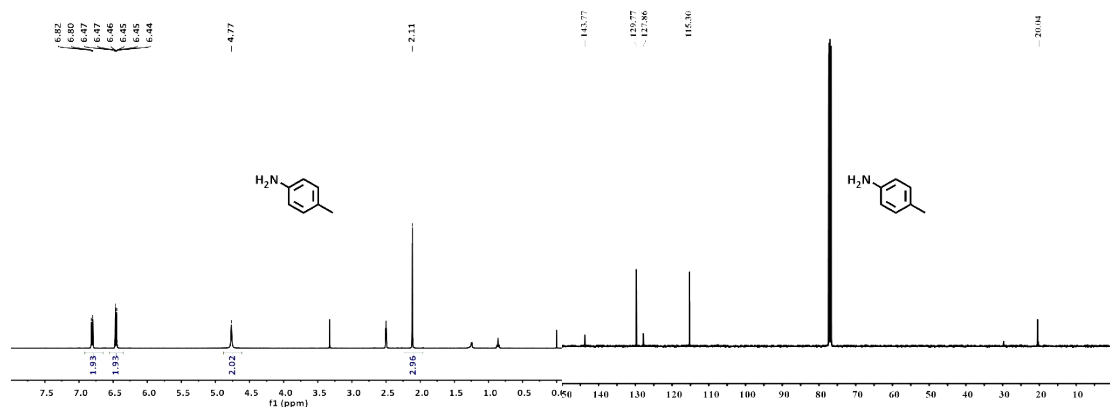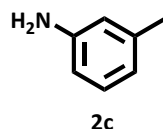

### m-Toluidine (2c) :

The product is isolated by column chromatography on silica gel as colorless liquid



(isolated yield: 89%),  $R_f$  (petroleum ether/ethyl acetate 5:1) = 0.4,  $^1\text{H}$  NMR (400 MHz,  $\text{DMSO-}d_6$ )  $\delta$  6.87 (t,  $J = 7.6$  Hz, 1H), 6.54 – 6.21 (m, 3H), 4.90 (s, 2H), 2.14 (s, 3H).  $^{13}\text{C}$  NMR (101 MHz, Chloroform- $d$ )  $\delta$  146.32, 139.15, 129.19, 119.50, 115.96, 112.29, 21.46. HRMS (ESI) calculated for  $\text{C}_7\text{H}_{10}\text{N}$  [ $\text{M} + \text{H}$ ]: 108.0813, Found: 108.0804.

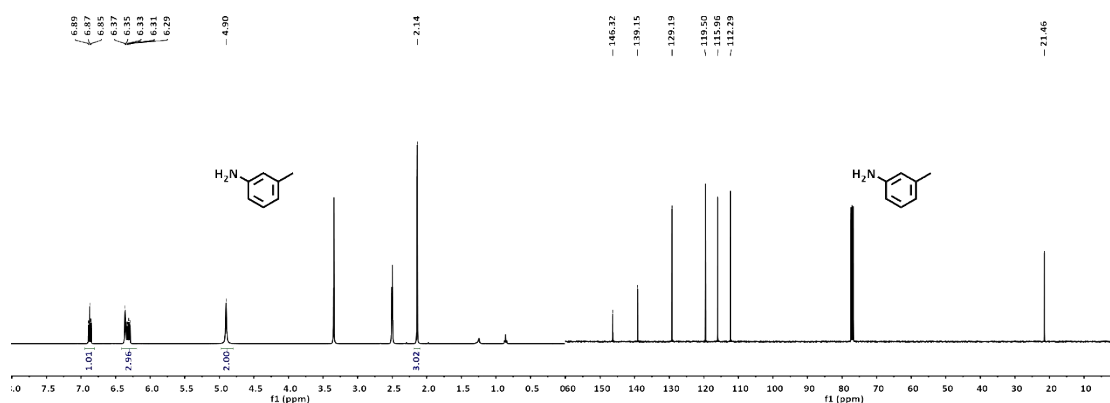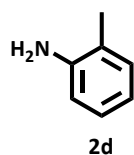

### **o-Toluidine (2d) :**

The product is isolated by column chromatography on silica gel as pale yellow liquid (isolated yield: 90%),  $R_f$  (petroleum ether/ethyl acetate 5:1) = 0.4,  $^1\text{H}$  NMR (400 MHz,  $\text{DMSO-}d_6$ )  $\delta$  6.96 – 6.82 (m, 2H), 6.58 (d,  $J = 7.8$  Hz, 1H), 6.44 (t,  $J = 7.3$  Hz, 1H), 4.76 (s, 2H), 2.03 (s, 3H).  $^{13}\text{C}$  NMR (101 MHz, Chloroform- $d$ )  $\delta$  144.56, 130.47, 126.99, 122.36, 118.67, 114.97, 17.39. HRMS (ESI) calculated for  $\text{C}_7\text{H}_{10}\text{N}$  [ $\text{M} + \text{H}$ ]: 108.0813, Found: 108.0798.

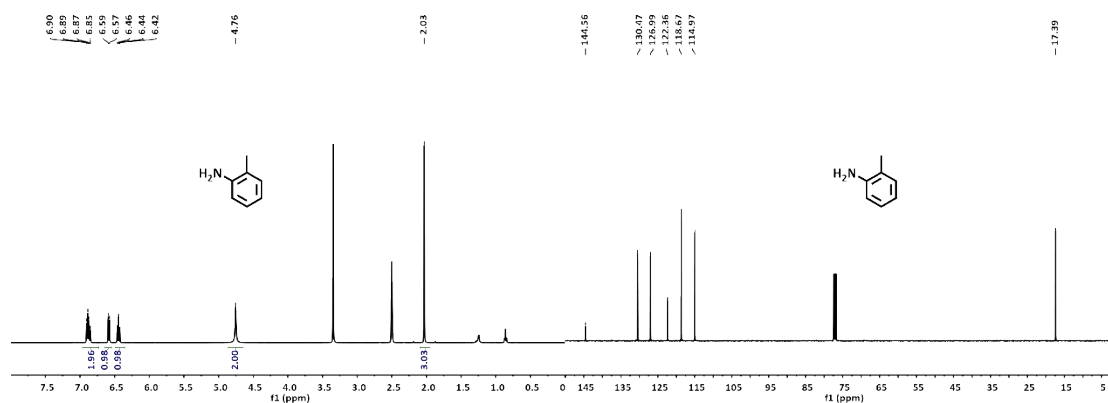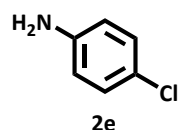

#### 4-Chloroaniline (2e) :

The product is isolated by column chromatography on silica gel as white solid (isolated yield: 79%),  $R_f$  (petroleum ether/ethyl acetate 5:1) = 0.4,  $^1\text{H NMR}$  (400 MHz,  $\text{DMSO-}d_6$ )  $\delta$  7.14 – 6.92 (m, 2H), 6.65 – 6.39 (m, 2H), 5.22 (s, 2H).  $^{13}\text{C NMR}$  (101 MHz,  $\text{Chloroform-}d$ )  $\delta$  144.96, 129.13, 123.18, 116.24. HRMS (ESI) calculated for  $\text{C}_6\text{H}_5\text{ClN}$  [M - H]: 126.0111, Found: 126.0090.

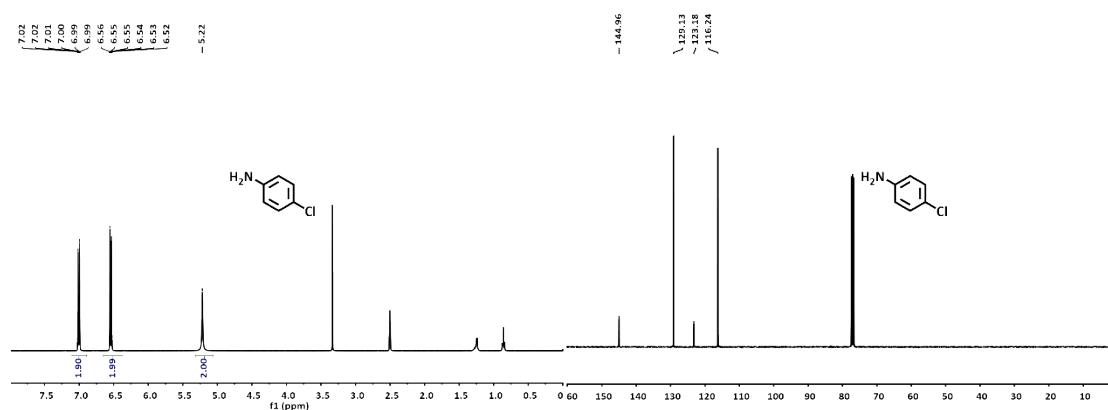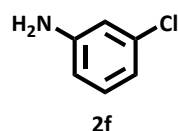

#### 3-Chloroaniline (2f) :

The product is isolated by column chromatography on silica gel as pale yellow liquid

(isolated yield: 74%),  $R_f$  (petroleum ether/ethyl acetate 5:1) = 0.4,  $^1\text{H}$  NMR (400 MHz,  $\text{DMSO-}d_6$ )  $\delta$  6.99 (t,  $J$  = 8.0 Hz, 1H), 6.61 – 6.55 (m, 1H), 6.48 (dt,  $J$  = 7.7, 2.8 Hz, 2H), 5.38 (s, 2H).  $^{13}\text{C}$  NMR (101 MHz, Chloroform- $d$ )  $\delta$  147.63, 134.86, 130.33, 118.48, 114.94, 113.20. HRMS (ESI) calculated for  $\text{C}_6\text{H}_5\text{ClN}$  [ $\text{M} - \text{H}$ ]: 126.0111, Found: 126.0109.

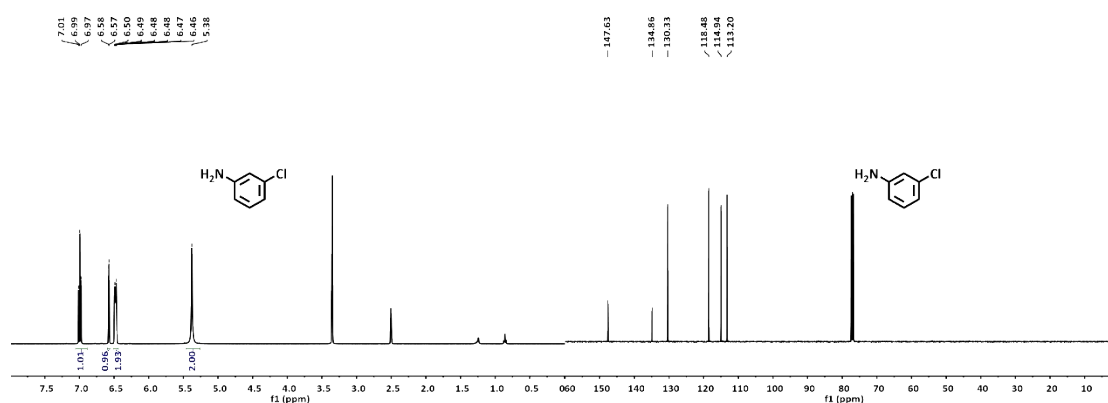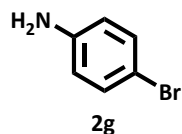

#### 4-Bromoaniline (2g) :

The product is isolated by column chromatography on silica gel as grey solid (isolated yield: 72%),  $R_f$  (petroleum ether/ethyl acetate 5:1) = 0.4,  $^1\text{H}$  NMR (400 MHz,  $\text{DMSO-}d_6$ )  $\delta$  7.24 – 7.05 (m, 2H), 6.62 – 6.37 (m, 2H), 5.25 (s, 2H).  $^{13}\text{C}$  NMR (101 MHz, Chloroform- $d$ )  $\delta$  145.44, 132.04, 116.73, 110.23. HRMS (ESI) calculated for  $\text{C}_6\text{H}_5\text{BrN}$  [ $\text{M} - \text{H}$ ]: 169.9606, Found: 169.9594.

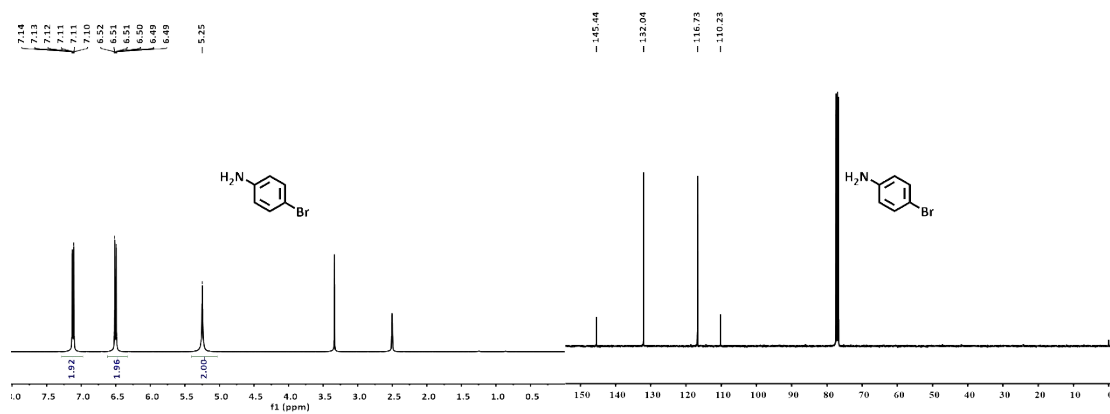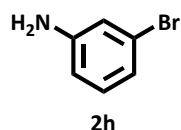

### 3-Bromoaniline (2h) :

The product is isolated by column chromatography on silica gel as yellow liquid (isolated yield: 70%),  $R_f$  (petroleum ether/ethyl acetate 5:1) = 0.4,  $^1\text{H}$  NMR (400 MHz,  $\text{DMSO-}d_6$ )  $\delta$  6.94 (t,  $J$  = 8.0 Hz, 1H), 6.73 (s, 1H), 6.61 (dd,  $J$  = 7.8, 1.7 Hz, 1H), 6.52 (dd,  $J$  = 8.1, 2.0 Hz, 1H), 5.37 (s, 2H).  $^{13}\text{C}$  NMR (101 MHz, Chloroform- $d$ )  $\delta$  146.74, 129.56, 121.99, 120.31, 116.76, 112.58. HRMS (ESI) calculated for  $\text{C}_6\text{H}_5\text{BrN}$  [ $\text{M} - \text{H}$ ]: 169.9606, Found: 169.9587.

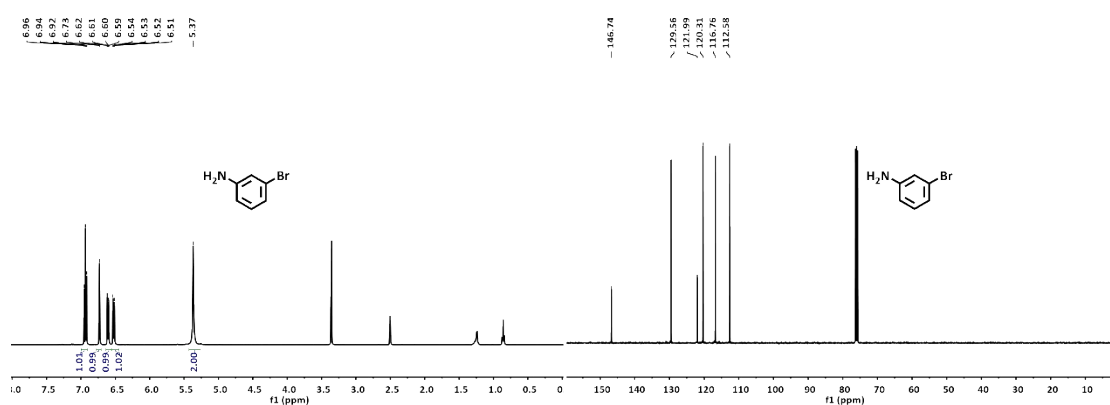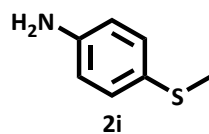

### 4-(Methylmercapto)aniline (2i) :

The product is isolated by column chromatography on silica gel as black liquid (isolated yield: 92%),  $R_f$  (petroleum ether/ethyl acetate 3:1) = 0.4,  $^1\text{H NMR}$  (400 MHz,  $\text{DMSO-}d_6$ )  $\delta$  7.16 – 6.93 (m, 2H), 6.64 – 6.41 (m, 2H), 5.15 (s, 2H), 2.32 (s, 3H).  $^{13}\text{C NMR}$  (101 MHz,  $\text{Chloroform-}d$ )  $\delta$  145.08, 131.11, 125.89, 115.75, 18.82. HRMS (ESI) calculated for  $\text{C}_7\text{H}_{10}\text{NS}$  [M + H]: 140.0534, Found: 140.0513.

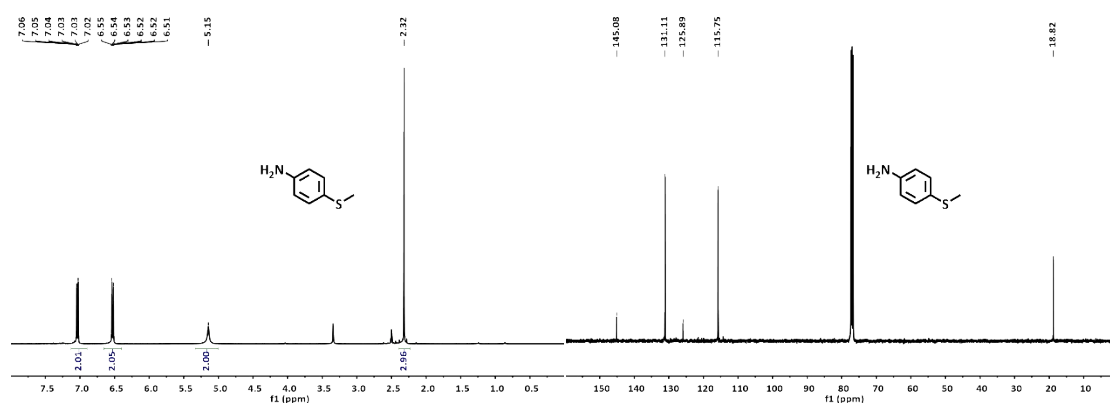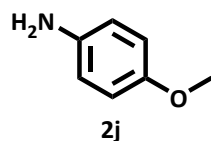

### **p-Anisidine (2j) :**

The product is isolated by column chromatography on silica gel as dark grey solid (isolated yield: 87%),  $R_f$  (petroleum ether/ethyl acetate 3:1) = 0.5,  $^1\text{H NMR}$  (400 MHz,  $\text{DMSO-}d_6$ )  $\delta$  6.69 – 6.61 (m, 2H), 6.55 – 6.49 (m, 2H), 4.60 (s, 2H), 3.62 (s, 3H).  $^{13}\text{C NMR}$  (101 MHz,  $\text{Chloroform-}d$ )  $\delta$  152.86, 139.92, 116.43, 114.85, 55.76. HRMS (ESI) calculated for  $\text{C}_7\text{H}_{10}\text{NO}$  [M + H]: 124.0762, Found: 124.0742.

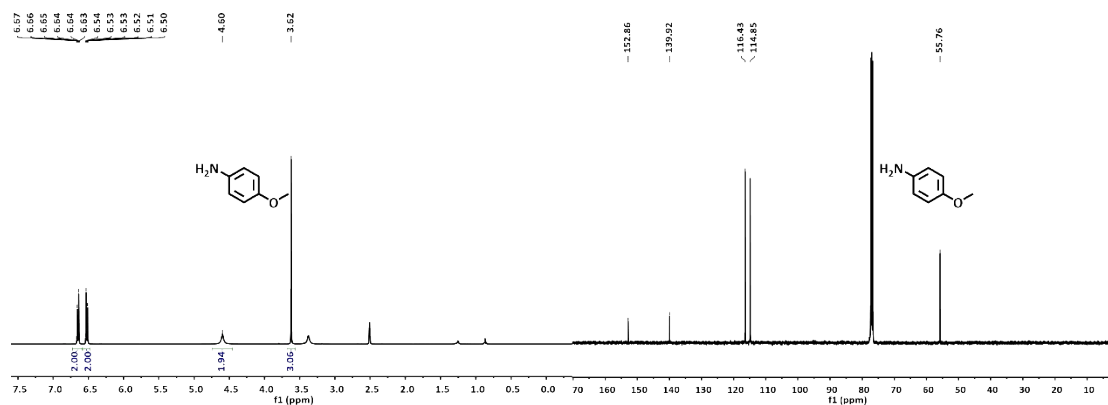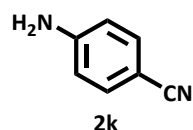

#### 4-Aminobenzonitrile (2k) :

The product is isolated by column chromatography on silica gel as pale yellow solid (isolated yield: 88%),  $R_f$  (petroleum ether/ethyl acetate 2:1) = 0.4,  $^1\text{H}$  NMR (400 MHz, DMSO- $d_6$ )  $\delta$  7.38 (dd, 2H), 6.60 (dd, 2H), 6.14 (s, 2H), 4.14 (s, 2H).  $^{13}\text{C}$  NMR (101 MHz, Chloroform- $d$ )  $\delta$  150.38, 133.82, 120.10, 114.45, 100.28. HRMS (ESI) calculated for  $\text{C}_7\text{H}_6\text{N}_2\text{Na}$  [ $M + \text{Na}$ ]: 141.0429, Found: 141.0409.

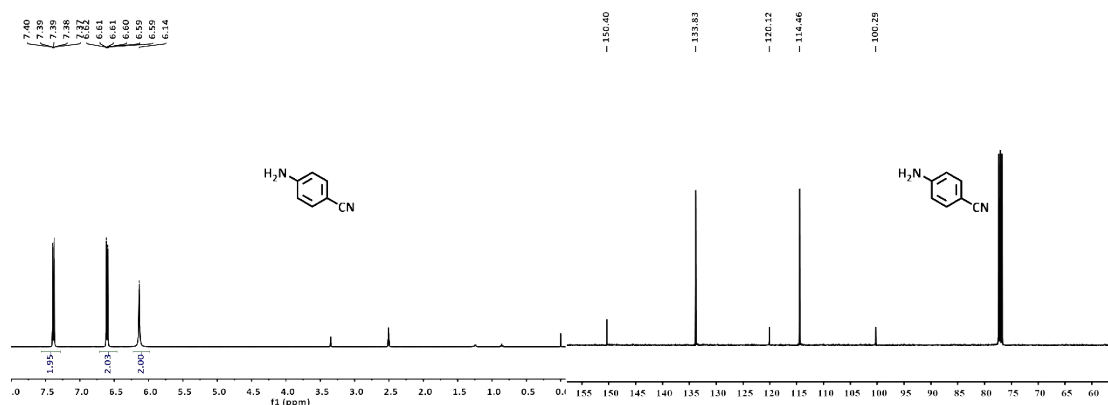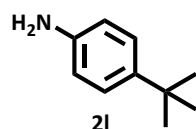

#### 4-tert-Butylaniline (2l) :

The product is isolated by column chromatography on silica gel as pale yellow liquid

(isolated yield: 80%),  $R_f$  (petroleum ether/ethyl acetate 5:1) = 0.3,  $^1\text{H}$  NMR (400 MHz,  $\text{DMSO-}d_6$ )  $\delta$  7.15 – 6.92 (m, 2H), 6.63 – 6.40 (m, 2H), 4.83 (s, 2H), 1.20 (s, 9H).  $^{13}\text{C}$  NMR (101 MHz,  $\text{Chloroform-}d$ )  $\delta$  143.15, 141.86, 126.08, 115.26, 33.95, 31.52. HRMS (ESI) calculated for  $\text{C}_{10}\text{H}_{16}\text{N}$  [ $\text{M} + \text{H}$ ]: 150.1283, Found: 150.1263.

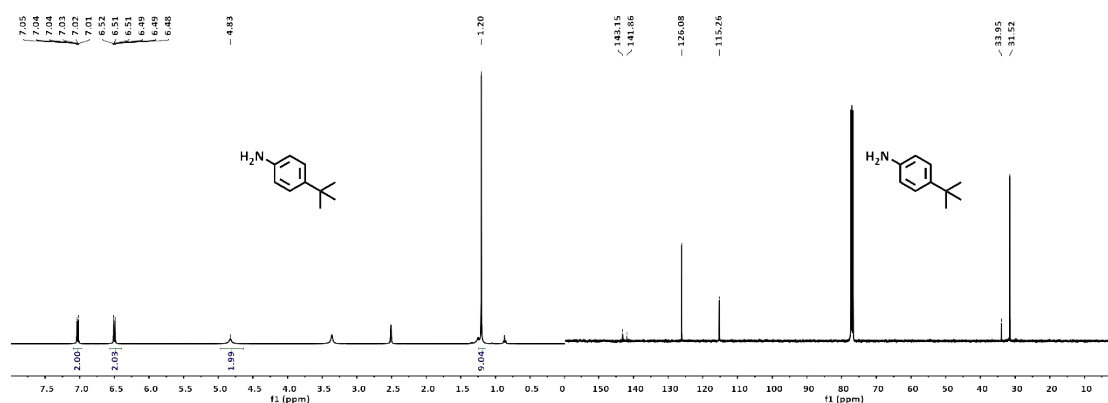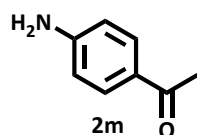

#### 4-Aminoacetophenone (2m) :

The product is isolated by column chromatography on silica gel as yellow solid (isolated yield: 82%),  $R_f$  (petroleum ether/ethyl acetate 2:1) = 0.5,  $^1\text{H}$  NMR (400 MHz,  $\text{DMSO-}d_6$ )  $\delta$  7.66 (d,  $J = 8.4$  Hz, 2H), 6.55 (d,  $J = 8.5$  Hz, 2H), 6.03 (s, 2H), 2.38 (s, 3H).  $^{13}\text{C}$  NMR (101 MHz,  $\text{Chloroform-}d$ )  $\delta$  196.50, 151.17, 130.80, 127.85, 113.72, 26.08. HRMS (ESI) calculated for  $\text{C}_8\text{H}_9\text{NONa}$  [ $\text{M} + \text{Na}$ ]: 158.0582, Found: 158.0561.

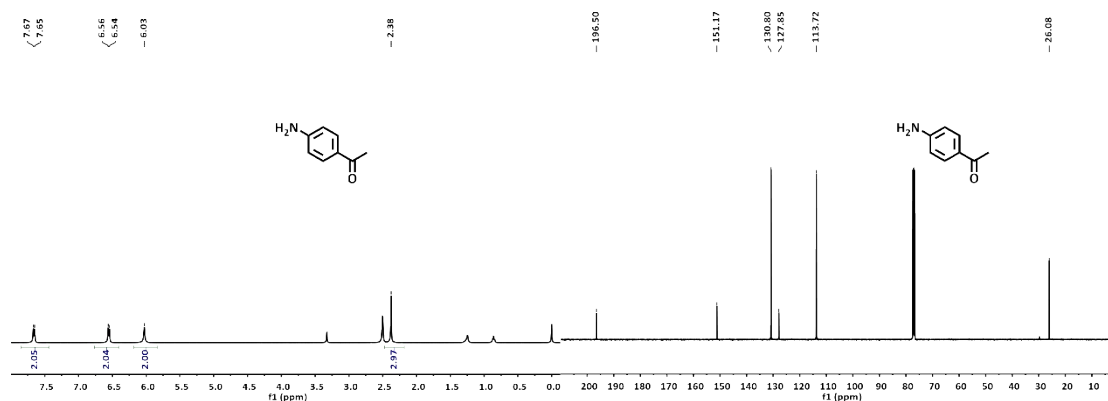

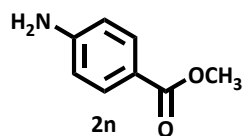

### Methyl 4-aminobenzoate (2n) :

The product is isolated by column chromatography on silica gel as white solid (isolated yield: 95%),  $R_f$  (petroleum ether/ethyl acetate 2:1) = 0.4,  $^1\text{H NMR}$  (400 MHz,  $\text{DMSO-}d_6$ )  $\delta$  7.63 (d,  $J = 8.7$  Hz, 2H), 6.56 (d,  $J = 8.7$  Hz, 2H), 5.97 (s, 2H), 3.72 (s, 3H).  $^{13}\text{C NMR}$  (101 MHz,  $\text{CDCl}_3$ )  $\delta$  167.17, 150.81, 131.60, 119.76, 113.81, 51.61. HRMS (ESI) calculated for  $\text{C}_8\text{H}_8\text{NO}_2$  [M - H]: 150.0555, Found: 150.0536.

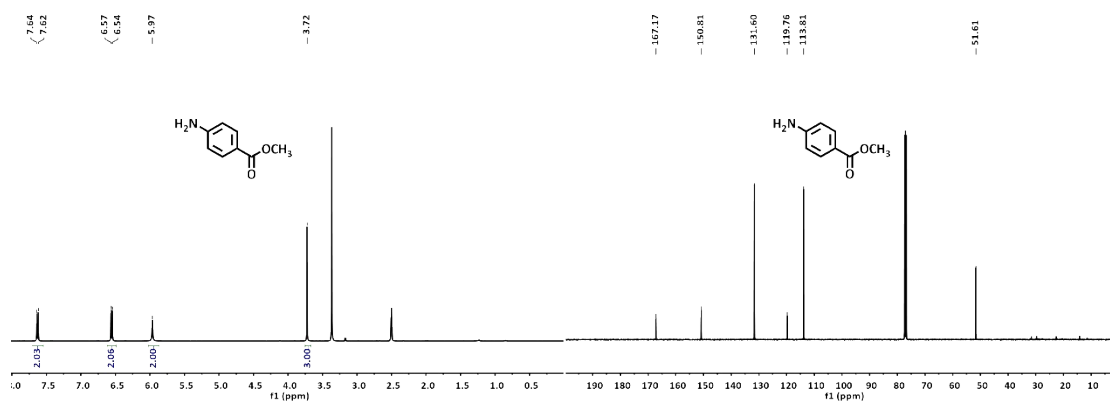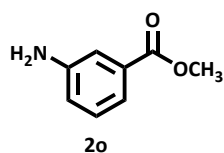

### Methyl 3-aminobenzoate (2o) :

The product is isolated by column chromatography on silica gel as grey solid (isolated yield: 88%),  $R_f$  (petroleum ether/ethyl acetate 2:1) = 0.4,  $^1\text{H NMR}$  (400 MHz,  $\text{DMSO-}d_6$ )  $\delta$  7.22 – 7.18 (m, 1H), 7.14 (t,  $J = 7.6$  Hz, 1H), 7.11 – 7.07 (m, 1H), 6.80 (ddd,  $J = 7.7, 2.4, 1.4$  Hz, 1H), 5.40 (s, 2H), 3.80 (s, 3H).  $^{13}\text{C NMR}$  (101 MHz,  $\text{Chloroform-}d$ )  $\delta$  167.28, 146.40, 131.14, 129.27, 119.75, 119.43, 115.81, 52.04. HRMS (ESI) calculated for  $\text{C}_8\text{H}_8\text{NO}_2$  [M - H]: 150.0555, Found: 150.0533.





The product is isolated by column chromatography on silica gel as yellow solid (isolated yield: 83%),  $R_f$  (petroleum ether/ethyl acetate 5:1) = 0.4,  $^1\text{H}$  NMR (400 MHz,  $\text{DMSO-}d_6$ )  $\delta$  8.26 (d,  $J = 9.2$  Hz, 1H), 7.98 (t,  $J = 9.2$  Hz, 3H), 7.93 – 7.84 (m, 3H), 7.71 (d,  $J = 8.8$  Hz, 1H), 7.37 (d,  $J = 8.3$  Hz, 1H), 6.34 (s, 2H).  $^{13}\text{C}$  NMR (101 MHz, Chloroform- $d$ )  $\delta$  140.89, 132.20, 131.65, 127.61, 126.01 (d,  $J = 6.8$  Hz), 125.50, 124.30, 124.11, 123.75, 123.55, 120.15, 116.88, 113.96. HRMS (ESI) calculated for  $\text{C}_{16}\text{H}_{11}\text{N}$  [M - H]: 216.0813, Found: 216.0786.

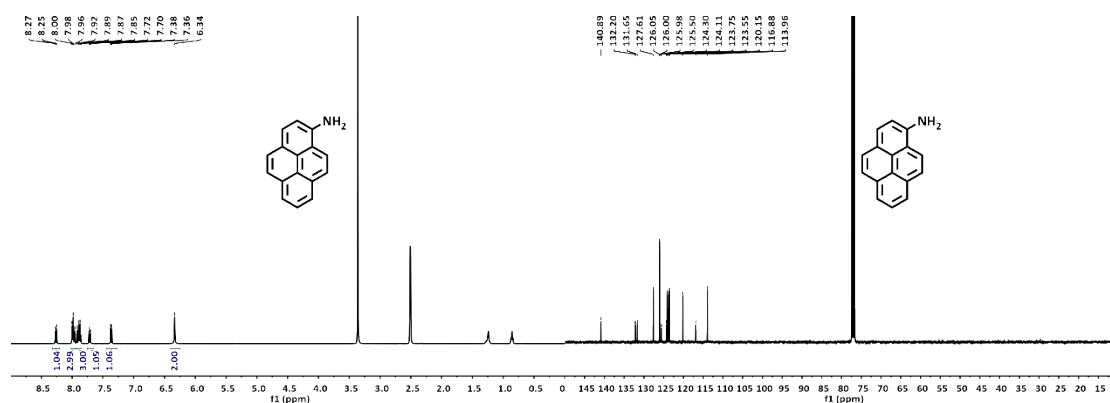

## Reference

1. S. Bi, C. Yang, W. Zhang, J. Xu, L. Liu, D. Wu, X. Wang, Y. Han, Q. Liang and F. Zhang, *Nat. Commun.*, 2019, **10**, 2467.
2. C. Liu, Y. Xiao, Q. Yang, Y. Wang, R. Lu, Y. Chen, C. Wang and H. Yan, *Appl. Surf. Sci.*, 2021, **537**.
3. V. S. Vyas, F. Haase, L. Stegbauer, G. Savasci, F. Podjaski, C. Ochsenfeld and B. V. Lotsch, *Nat. Commun.*, 2015, **6**, 8508.
4. J. Thote, H. B. Aiyappa, A. Deshpande, D. Díaz Díaz, S. Kurungot and R. Banerjee, *Chem. Eur. J.*, 2014, **20**, 15961.
5. H. Dong, X.-B. Meng, X. Zhang, H.-L. Tang, J.-W. Liu, J.-H. Wang, J.-Z. Wei, F.-M. Zhang, L.-L. Bai and X.-J. Sun, *Chem. Eng. J.*, 2020, **379**, 122342.
6. W. Dong, Z. Qin, K. Wang, Y. Xiao, X. Liu, S. Ren, L. Li, *Angew. Chem. Int. Ed.*, 2022, e202216073.
7. S. Wei, F. Zhang, W. Zhang, P. Qiang, K. Yu, X. Fu, D. Wu, S. Bi, F. Zhang, *J. Am. Chem. Soc.* 2019, **141**, 14272.
8. J. Ming, A. Liu, J. Zhao, P. Zhang, H. Huang, H. Lin, Z. Xu, X. Zhang, X. Wang, J. Hofkens, M. B. J. Roeffaers and J. Long, *Angew. Chem. Int. Ed.*, 2019, **58**, 18290.
9. F. Haase, T. Banerjee, G. Savasci, C. Ochsenfeld and B. V. Lotsch, *Faraday Discuss.*, 2017,

201, 247.

10. T. Banerjee, F. Haase, G. Savasci, K. Gottschling, C. Ochsenfeld and B. V. Lotsch, *J. Am. Chem. Soc.*, 2017, **139**, 16228.
11. Z.-A. Lan, Y. Fang, X. Chen and X. Wang, *Chem. Commun.*, 2019, **55**, 7756.
12. E. Jin, Z. Lan, Q. Jiang, K. Geng, G. Li, X. Wang and D. Jiang, *Chem*, 2019, **5**, 1632.
13. L. Y. Li, Z. M. Zhou, L. Y. Li, Z. Y. Zhuang, J. H. Bi, J. H. Chen, Y. Yu and J. G. Yu, *ACS Sustain. Chem. Eng.*, 2019, **7**, 18574.
14. S. Bi, Z.-A. Lan, S. Paasch, W. Zhang, Y. He, C. Zhang, F. Liu, D. Wu, X. Zhuang, E. Brunner, X. Wang and F. Zhang, *Adv. Funct. Mater.*, 2017, **27**, 1703146.
15. F. Li, D. Wang, Q.-J. Xing, G. Zhou, S.-S. Liu, Y. Li, L.-L. Zheng, P. Ye and J.-P. Zou, *Appl. Catal. B: Environ.*, 2019, **243**, 621.
16. J.-L. Sheng, H. Dong, X.-B. Meng, H.-L. Tang, Y.-H. Yao, D.-Q. Liu, L.-L. Bai, F.-M. Zhang, J.-Z. Wei and X.-J. Sun, *ChemCatChem*, 2019, **11**, 2313.
17. P. Pachfule, A. Acharjya, J. Roeser, T. Langenhahn, M. Schwarze, R. Schomäcker, A. Thomas and J. Schmidt, *J. Am. Chem. Soc.*, 2018, **140**, 1423.
18. C. B. Meier, R. Clowes, E. Berardo, K. E. Jelfs, M. A. Zwijnenburg, R. S. Sprick and A. I. Cooper, *Chem. Mater.*, 2019, **31**, 8830.
19. A. F. M. El-Mahdy, A. M. Elewa, S.-W. Huang, H.-H. Chou and S.-W. Kuo, *Adv. Opt. Mater.*, 2020, **8**.
20. R. Lu, C. Liu, Y. Chen, L. Tan, G. Yuan, P. Wang, C. Wang, H. Yan, *Journal of Photochemistry.*, 2021, **421**, 113546.
21. X. Wu, M. Zhang, Y. Xia, C. Ru, P. Chen, H. Zhao, L. Zhou, C. Gong, J. Wu, X. Pan, *J. Mater. Chem. A.*, 2022, **10**, 17691.
22. S. Ghosh, A. Nakada, M. A. Springer, T. Kawaguchi, K. Suzuki, H. Kaji, I. Baburin, A. Kuc, T. Heine, H. Suzuki, R. Abe and S. Seki, *J. Am. Chem. Soc.*, 2020, **142**, 9752.
23. B. P. Biswal, H. A. Vignolo-González, T. Banerjee, L. Grunenberg, G. Savasci, K. Gottschling, J. Nuss, C. Ochsenfeld and B. V. Lotsch, *J. Am. Chem. Soc.*, 2019, **141**, 11082.
24. G.-B. Wang, S. Li, C.-X. Yan, Q.-Q. Lin, F.-C. Zhu, Y. Geng, Y.-B. Dong, *Chem. Commun.*, 2020, **56**, 12612.
25. F.-M. Zhang, J.-L. Sheng, Z.-D. Yang, X.-J. Sun, H.-L. Tang, M. Lu, H. Dong, F.-C. Shen, J. Liu and Y.-Q. Lan, *Angew. Chem. Int. Ed.*, 2018, **57**, 12106.
26. G.-B. Wang, F.-C. Zhu, Q.-Q. Lin, J.-L. Kan, K.-H. Xie, S. Li, Y. Geng, Y.-B. Dong, *Chem. Commun.*, 2021, **57**, 4464.
27. X. Wang, L. Chen, S. Y. Chong, M. A. Little, Y. Wu, W.-H. Zhu, R. Clowes, Y. Yan, M. A. Zwijnenburg, R. S. Sprick and A. I. Cooper, *Nat. Chem.*, 2018, **10**, 1180.
28. L. Stegbauer, K. Schwinghammer and B. V. Lotsch, *Chem. Sci.*, 2014, **5**, 2789.
29. W. Li, X. Huang, T. Zeng, Y. A. Liu, W. Hu, H. Yang, Y.-B. Zhang and K. Wen, *Angew. Chem. Int. Ed.*, 2020, **60**, 1869.
30. J. Xu, C. Yang, S. Bi, W. Wang, Y. He, D. Wu, Q. Liang, X. Wang and F. Zhang, *Angew. Chem. Int. Ed.*, 2020, **59**, 23845.
31. W. Chen, L. Wang, D. Mo, F. He, Z. Wen, X. Wu, H. Xu and L. Chen, *Angew. Chem. Int. Ed.*, 2020, **59**, 16902.
32. Y.-P. Zhang, H.-L. Tang, H. Dong, M.-Y. Gao, C.-C. Li, X.-J. Sun, J.-Z. Wei, Y. Qu, Z.-J. Li and F.-M. Zhang, *J. Mater. Chem. A.*, 2020, **8**, 4334.

33. M. Y. Gao, C. C. Li, H. L. Tang, X. J. Sun, H. Dong and F. M. Zhang, *J. Mater. Chem. A*, 2019, **7**, 20193.
34. M. Luo, Q. Yang, K. Liu, H. Cao and H. Yan, *Chem. Commun.*, 2019, **55**, 5829.
35. C.-C. Li, M.-Y. Gao, X.-J. Sun, H.-L. Tang, H. Dong and F.-M. Zhang, *Appl. Catal. B: Environ.*, 2020, **266**.
36. Y.-H. Yao, J. Li, H. Zhang, H.-L. Tang, L. Fang, G.-D. Niu, X.-J. Sun and F.-M. Zhang, *J. Mater. Chem. A*, 2020, **8**, 8949.
37. Y.-J. Cheng, R. Wang, S. Wang, X.-J. Xi, L.-F. Ma and S.-Q. Zang, *Chem. Commun.*, 2018, **54**, 13563.
38. W. Li, X. Ding, B. Yu, H. Wang, Z. Gao, X. Wang, X. Liu, K. Wang, J. Jiang, *Adv. Funct. Mater.*, 2022, **32**, 2207394.
39. H. Yan, Y.-H. Liu, Y. Yang, H.-Y. Zhang, X.-R. Liu, J.-Z. Wei, L.-L. Bai, Y. Wang, F.-M. Zhang, *Chem. Eur. J.*, **431**, 133404.
40. Z. Mi, T. Zhou, W. Weng, J. Unruangsri, K. Hu, W. Yang, C. Wang, K. A. I. Zhang, J. Guo, *Angew. Chem. Int. Ed.*, 2021, **60**, 9642.
41. Y. Zang, R. Wang, P.-P. Shao, X. Feng, S. Wang, S.-Q. Zang and T. C. W. Mak, *J. Mater. Chem. A*, 2020, **8**, 25094.
42. S. Ma, T. Deng, Z. Li, Z. Zhang, J. Jia, Q. Li, G. Wu, H. Xia, S.-W. Yang, X. Liu, *Angew. Chem. Int. Ed.*, 2022, **61**, e202208919.
